1 **Chitinase-like protein promotes tumorigenesis through disruption of cell polarity via**  
2 **enlarged vesicles.**

3 Dilan Khalili<sup>1</sup>, Martin Kunc<sup>1</sup>, Sarah Herbrich<sup>1</sup>, Anna M. Müller<sup>1</sup> and Ulrich Theopold<sup>1</sup>

4

5 <sup>1</sup> Department of Molecular Biosciences, The Wenner-Gren Institute (MBW), Stockholm  
6 University, 10691 Stockholm, Sweden

7 Ulrich Theopold, Department of Molecular Biosciences, The Wenner-Gren Institute (MBW),  
8 Stockholm University, Svante Arrheniusväg 20c, 10691 Stockholm, Sweden

9 Phone: +46-8-164181

10 Email: [uli.theopold@su.se](mailto:uli.theopold@su.se)

11

12 **Abstract:**

13 Chitinase-like proteins (CLPs) are associated with tissue-remodelling and inflammation but  
14 also with several disorders, including fibrosis, atherosclerosis, allergies, and cancer. However,  
15 the CLP's role in tumors is far from clear. Here, we utilize *Drosophila melanogaster* to  
16 investigate the function of CLPs (imaginal disc growth factors; Idgf's) in *Ras*<sup>V12</sup> dysplastic  
17 salivary glands (SGs). We find one of the Idgf's members, *Idgf3*, to be transcriptionally induced  
18 in a tissue- and cell-autonomously manner in a *Drosophila* hypertrophic model for early tumor  
19 progression. Induction involves non-canonical JNK-signaling via a positive feedback loop  
20 mediated by reactive oxygen species (ROS). Moreover, *Idgf3* accumulates in enlarged vesicles  
21 (EnVs) that promote tumor progression by disrupting cytoskeletal organization, independent of  
22 Rab5 and Rab11. The process is mediated via Rac1 and the downstream component,  $\alpha$ Spectrin,  
23 which localizes to the EnVs. Similar to *Idgf3*, expression of two human members of the CLP  
24 family in *Drosophila* SGs aggravates tumor-related phenotypes. Our data provide new insight  
25 into a phylogenetically conserved tissue-autonomous CLP function in tumors and identify  
26 specific targets for tumor control.

27 **Introduction:**

28 Chitinase-like protein (CLPs), including human Ch3L2 (YKL-39) and Ch3L1 (YKL-40) are  
29 released in various inflammatory conditions, including tumors. These proteins are secreted  
30 amongst others by immune cells, are often associated with a poor prognosis, and may promote  
31 tumor growth through interaction with the tumor microenvironment (Roslind and Johansen  
32 2009, Shao, Hamel et al. 2009). CLPs are upregulated in patients with ductal tumors, including  
33 tumors in the lung, the breast and the pancreas (Johansen, Jensen et al. 2006, Uhlen, Zhang et  
34 al. 2017).

35 The discovery of the human Rat sarcoma (Ras) oncogene more than 40 years ago has led to a  
36 substantial improvement of our understanding of cancer biology. The oncogene is mutated or  
37 dysregulated in a large number of non-physiological contexts, including pancreatitis

38 (Fernandez-Medarde, De Las Rivas et al. 2021). Pancreatitis is characterized by inflammation,  
39 death-signaling, fibrosis, loss of cell polarity, immune cell recruitment, and obstruction of  
40 pancreatic ducts mediated via *KRAS* (Pinho, Chantrill et al. 2014). However, the causal  
41 connection between CLPs' function and tumor progression is only partially elucidated (Park,  
42 Yun et al. 2020).

43 Animal models have been increasingly used in molecular oncology. This includes the fruitfly  
44 *Drosophila melanogaster*, where overexpression of dominant-active Ras ( $Ras^{V12}$ ) in  
45 proliferating tissue leads to benign tumors, simultaneous reduction of cell polarity genes and to  
46 progression towards an invasive stage. (Brumby and Richardson 2003, Pagliarini and Xu 2003,  
47 Igaki, Pagliarini et al. 2006, Perez, Lindblad et al. 2017). Central to this switch is the C-Jun N-  
48 terminal kinase (JNK) - signaling pathway, which can become activated via loss of cell polarity  
49 and promotes tumor growth (Zhu, Xin et al. 2010). However, the outcome of activated JNK is  
50 mediated in a context-dependent manner due to downstream effects, several of which are yet to  
51 be elucidated (Ciapponi, Jackson et al. 2001, Zeke, Misheva et al. 2016). Among potential JNK  
52 regulators, spectrin family members belong to cytoskeletal proteins which form a spectrin-  
53 based membrane skeleton (SBMS) (Bennett and Baines 2001). Through the Rac family of small  
54 GTPases, cell polarity and SBMS organization are maintained (Lee and Thomas 2011, Fletcher,  
55 Elbediwy et al. 2015). Although the exact relationship between Spectrin and JNK in tumors  
56 remains to be established, Rac1 cooperates with JNK in tissue growth (Baek, Kwon et al. 2010,  
57 Wertheimer, Gutierrez-Uzquiza et al. 2012, Archibald, Mihai et al. 2015).

58 To explore the tissue autonomous function of CLPs in a ductal tumor, we utilize the *Drosophila*  
59 *melanogaster* salivary glands (SGs) - like the pancreas a terminally differentiated secretory  
60 organ. Generally, *Drosophila* CLPs are endogenously expressed in the larvae and include six  
61 members, termed Idgf 1-6 (Imaginal disc growth factors), which are involved in wound healing  
62 and restoration of cell organization (Kirkpatrick, Matico et al. 1995, Kawamura, Shibata et al.  
63 1999, Kucerova, Kubrak et al. 2016, Yadav and Eleftherianos 2018). The SGs epithelial luminal  
64 organization and the conserved activation of the tumor-promoting signaling factors make them  
65 suitable for dissecting CLP's tissue autonomous function. Moreover, the lumen separating a  
66 single layer of cells can be disrupted by constitutive active *Drosophila Ras* ( $Ras^{V12}$ ) (Krautz,  
67 Khalili et al. 2020).

68 Here we investigated the role of *Drosophila* Idgf's in  $Ras^{V12}$  SGs. We show that one of the CLP's  
69 members, *Idgf3*, is induced cell-autonomously, leading to a partial loss of epithelial polarity  
70 and decrease of the SG lumen. This involves induction of non-canonical JNK-signaling that  
71 regulates *Idgf3* independently of the downstream transcription factor Jun and Fos. Instead, ROS  
72 production via JNK promotes induction of *Idgf3*, creating a tumor-promoting signaling loop.  
73 *Idgf3* through Rac1 promotes the formation of enlarged vesicles (EnVs) via  $\alpha$ Spectrin.  
74 Inhibiting EnV formation by knocking-down *Idgf3* and the downstream factor,  $\alpha$ *Spectrin*,  
75 restores cell organization. Similar to *Idgf3*, overexpression of two human CLPs in *Drosophila*  
76  $Ras^{V12}$  SGs, aggravates hyperplasia and leads to EnV formation for one human CLP. Thus, our  
77 work signifies the evolutionary conserved importance of tumor-induced CLP's in the cell-  
78 autonomous dysregulation of ductal organs.

79

## 80 **Results**

81

### 82 **Idgf3 promotes a dysplastic phenotype**

83 Obstruction of the SG lumen by the constitutive-active oncogene, *Ras<sup>V12</sup>*, under the *Beadex-*  
84 *Gal4* driver (denoted as *Ras<sup>V12</sup>*) disrupts organ function between 96 h and 120 h after egg  
85 desposition (AED) (Khalili, Kalcher et al. 2021). Being that CLPs have been implicated in the  
86 loss of cell polarity (Morera, Steinhauser et al. 2019), we investigated whether *Drosophila*  
87 CLPs contribute to this phenotype. In order to find out whether CLPs were induced in *Ras<sup>V12</sup>*  
88 glands, we assessed relative mRNA levels at two different time points, 96 h and 120h AED.  
89 Only one of the *CLP* members, namely *Idgf3*, was significantly upregulated at both time points  
90 (Fig. 1B and Fig. S1A ). Therefore, we decided to focus on *Idgf3*'s effects on dysplastic glands.

91 To characterize the spatial and temporal expression of *Idgf3* we performed in situ hybridization  
92 (ISH) using *Idgf3-specific* probes. In SGs of *w<sup>1118</sup>* (denoted as *WT*) larvae, *Idgf3* was expressed  
93 in the most proximal part (PP) confirming earlier results (Fig. S1B at 96 h, (Kawamura, Shibata  
94 et al. 1999)). In line with qPCR data (Fig. S1A), a higher level of *Idgf3* was detected in *Ras<sup>V12</sup>*  
95 SGs (Fig. S1C). At 120 h, we still observed *Idgf3* in the PP of *WT* glands, while in *Ras<sup>V12</sup>* larvae,  
96 the signal was again substantially stronger and detected throughout the whole gland (Fig. S1D-  
97 E).

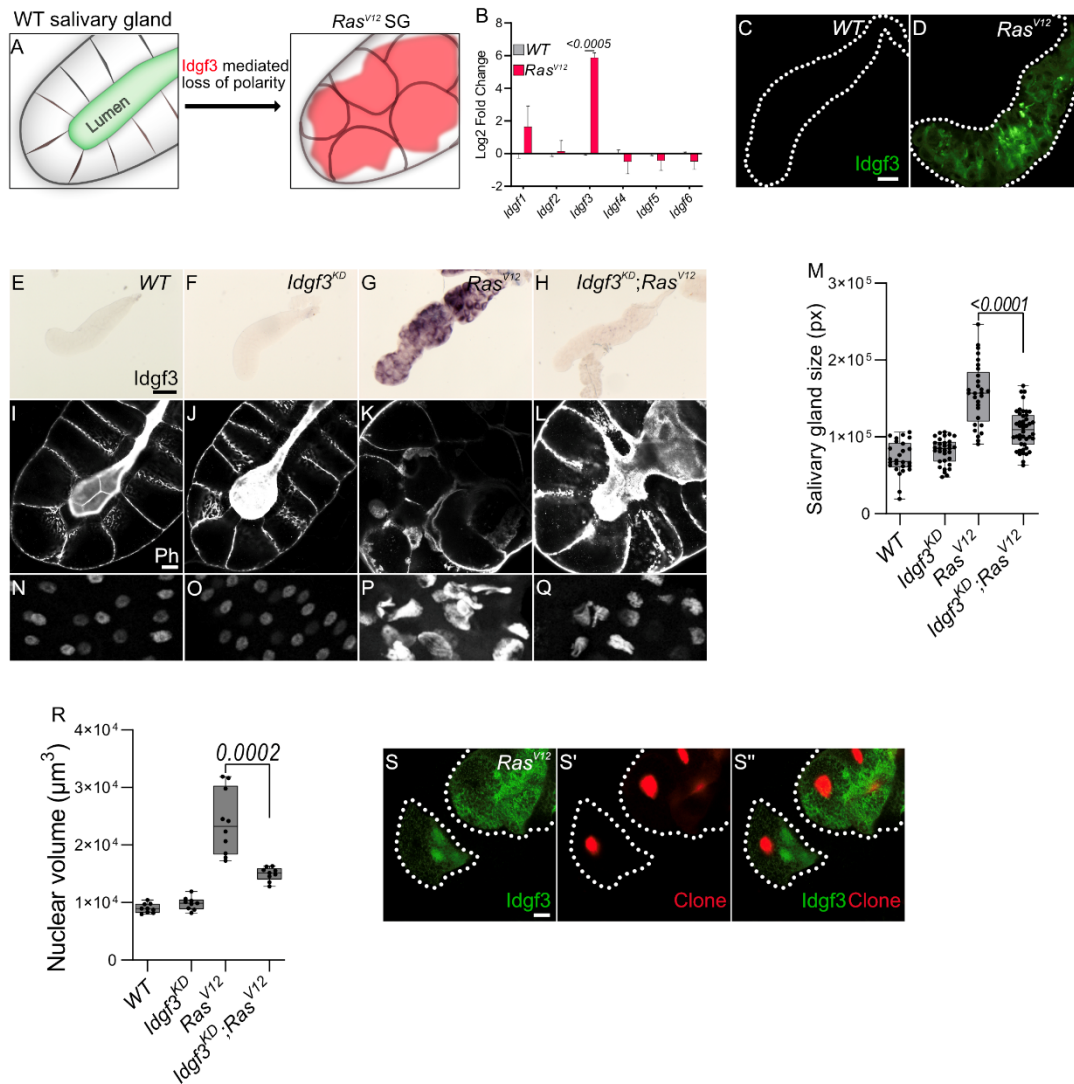

98

99 **Figure 1 *Idgf3* promotes growth and disrupts tissue architecture in a cell-autonomous**  
 100 **manner**

101 (A) *Idgf3* drives dysplasia upon oncogene, *Ras<sup>V12</sup>*, overexpression.

102 (B) qPCR data showing induction of *Idgf3* in 120 h AED *Ras<sup>V12</sup>* glands.

103 (C-D) *Idgf3* tagged with GFP was localized in the dysplastic glands.

104 (E-H) Knock-down of *Idgf3* in *Ras<sup>V12</sup>* glands confirmed reduced mRNA levels as shown with  
 105 in situ hybridization.

106 (I-L) F-actin (Phalloidin) staining revealed partial restoration of the lumen in *Idgf3-KD; Ras<sup>V12</sup>*  
 107 glands, in comparison to *Ras<sup>V12</sup>* alone.

108 (M) SG size quantification showing a reduction in tissue size in *Idgf3-KD; Ras<sup>V12</sup>* SG compared  
 109 to *Ras<sup>V12</sup>* alone.

110 (N-Q) Nuclei in DAPI stained SG displayed a reduced size in *Idgf3-KD; Ras<sup>V12</sup>*.

111 (R) Nuclear quantification showing nuclear volume in the indicated genotypes.

112 (S-S'') SG *Ras<sup>V12</sup>* clones displaying strong *Idgf3::GFP* signal.

113 Scale bars in (C-D) represent 100 μm (E-H), 0.3 mm and (I-L, S-S'') 20 μm. Data in (B)  
 114 represent 3 independent replicas summarized as mean ± SD. Boxplot in (M) represent at least  
 115 20 SG pairs and (R) represent 10 SG pairs. Whisker length min to max, bar represent median.  
 116 P-value quantified with Student's t-test.

117

118 *Idgf3* contains an N-terminal signal peptide and has been detected in hemolymph (Karlsson,  
119 Korayem et al. 2004). To analyze its subcellular tissue distribution in SGs, we used a C-  
120 terminally GFP-tagged version of *Idgf3* (Kucerova, Kubrak et al. 2016). At 96 h we could not  
121 detect *Idgf3* in the whole *WT* or *Ras<sup>V12</sup>* animals (Fig. S1F-G'), possibly due to limited sensitivity.  
122 Likewise, 120 h old *WT* larvae did not show any detectable signal (Fig. S1H-H') while a strong  
123 *Idgf3* signal was detected in *Ras<sup>V12</sup>* SGs (Fig S1I-I'). To better understand *Idgf3* distribution at a  
124 higher resolution, we dissected 120 h AED glands. *WT* glands had a weaker *Idgf3::GFP* signal  
125 in comparison to the *Ras<sup>V12</sup>* (Fig. 1C-D). Moreover, *Idgf3* was unevenly distributed throughout  
126 *Ras<sup>V12</sup>* SGs (Fig. 1D).

127 The increased level of *Idgf3* between 96 h and 120 h strongly correlated with loss of tissue- and  
128 cell-organization and an increased nuclear volume. In order to characterize the role of *Idgf3* in  
129 *Ras<sup>V12</sup>* glands, we used a specific *Idgf3 RNA-interference (RNAi, denoted as KD)*. We focused  
130 on 120 h larvae, unless otherwise stated, since they showed the most robust dysplastic  
131 phenotype. Efficient knockdown of *Idgf3* was confirmed using ISH and at protein level (Fig  
132 1E-H, S1J-M; quantified in N, (Kucerova, Kubrak et al. 2016)). Macroscopic inspection  
133 showed that *Idgf-KD;Ras<sup>V12</sup>* SGs were smaller than *Ras<sup>V12</sup>* SGs (Fig 1G-H, quantified in Fig  
134 1M), thus resembling *WT* controls. To gain insight into the cellular organization, we stained  
135 the glands for F-actin (Phalloidin: Ph) and DNA using DAPI. In *Idgf-KD* the cells retained their  
136 cuboidal structure, and the lumen was visible as in *WT*, indicating that *Idgf3* on its own does  
137 not affect cellular architecture (Fig. 1I-J). In contrast, in *Ras<sup>V12</sup>* glands cellular architecture was  
138 lost, and the lumen was absent (Fig. 1K, (Khalili, Kalcher et al. 2021)). In *Idgf-KD;Ras<sup>V12</sup>* SGs  
139 a reversal to the normal distribution of F-actin and partial restoration of the lumen was observed  
140 (Fig 1 L). Similarly, the nuclear volume, which increased in *Ras<sup>V12</sup>* SGs returned to near wild  
141 type levels upon *Idgf3-KD* (Fig. 1 N-Q, quantified in Fig 1R). This indicates that *Idgf3-KD* can  
142 rescue *Ras<sup>V12</sup>*-induced dysplasia.

143 In order to unravel the specific effects mediated by *Idgf3* we further investigated *Ras<sup>V12</sup>*  
144 associated phenotypes, including fibrosis and the cellular immune response. As recently  
145 reported, *Ras<sup>V12</sup>* SGs displayed increased levels of the extracellular matrix components (ECM),  
146 including collagen IV and SPARC (BM40, (Khalili, Kalcher et al. 2021)). *Idgf-KD* alone did  
147 not affect SPARC levels in comparison to the *WT* (Fig. S1 O-P) but *Idgf-KD;Ras<sup>V12</sup>* SGs  
148 displayed significantly reduced SPARC levels in comparison to *Ras<sup>V12</sup>* (Fig. S1 Q-R, quantified  
149 in S). To assess whether this led to a reduced inflammatory responses, we examined the  
150 recruitment of plasmacytes, macrophage-like cells previously reported to be recruited towards  
151 tumors (Perez, Lindblad et al. 2017). We found that both control and *Idgf-KD* glands did not  
152 show recruitment of hemocytes (Fig. S1T-U). In contrast to the effects on ECM components,  
153 *Idgf3-KD* in *Ras<sup>V12</sup>* glands did not lead to any changes in hemocyte attachment (Fig. S1V-W,  
154 quantified in X).

155 Finally, to assess whether *Idgf3::GFP* was induced cell-autonomously, we generated clones  
156 expressing *Ras<sup>V12</sup>* and nuclear *red fluorescent protein (RFP)* through a *heat-shock* driver. We  
157 found that *Idgf3::GFP* was expressed in the clonal tumor cells, whereas the *WT* cells were  
158 devoided of *Idgf3::GFP* (Fig. 1 S).



159 Taken together, upon *Ras<sup>VI2</sup>* overexpression, *Idgf3* is induced cell-autonomously and promotes  
160 SG overgrowth, loss of cell organization, and fibrotic-like accumulation of the ECM, but not  
161 immune cell recruitment.

## 162 **Idgf3 induces dysplasia via a non-canonical JNK-pathway**

163 Dysplasia is driven by internal and external factors that work either in concert or independently.  
164 Similar to what we observed in *Idgf3-KD;Ras<sup>VI2</sup>* glands, blocking the sole *Drosophila* JNK  
165 member *basket* reverts several tumour phenotypes. Moreover, the dysplastic loss of apical and  
166 basolateral polarity between 96 h and 120 h is driven by the JNK-pathway (Fig. 2A, (Krautz,  
167 Khalili et al. 2020)). The time frame in which we observed upregulation of *Idgf3* coincided with  
168 the period during which blocked JNK restored tissue organization and homeostasis, similar to  
169 what occurs in *Idgf-KD;Ras<sup>VI2</sup>* SGs (Fig. 1L, S1R). Therefore, we sought to determine the role  
170 of JNK-signaling in the regulation of *Idgf3*.

171 First, we performed a targeted JNK RNAi-screen using *Idgf3::GFP* intensity in the glands as a  
172 readout for KD of JNK signaling components. We confirmed the sensitivity of the *Idgf3::GFP*  
173 construct by *Idgf3-KD* in *Ras<sup>VI2</sup>* SGs compared to *Ras<sup>VI2</sup>* glands (Fig. S2A-B, quantified in Fig  
174 S2L). KD of the two classical TNF receptors upstream of JNK, *Grnd* (*Grindelwald*) and *Wgn*  
175 (*Wengen*) similarly reduced *Idgf3::GFP* intensity (Fig 2C-D, quantified in F, S2A-L; for the  
176 complete screen, (Palmerini, Monzani et al. 2021)). A similar effect was observed upon  
177 suppression of *dTAK*, a downstream component of *Grnd/Wgn*, in *Ras<sup>VI2</sup>* glands (Fig S2A, E,  
178 quantified in L). Furthermore, suppressing JNK using a dominant-negative version (*JNK<sup>DN</sup>*)  
179 displayed the strongest reduction of the *Idgf3::GFP* signal (Fig 2SA, F, quantified in L). Similar  
180 effects were observed with *JNK-KD* (Fig. 2B, E, quantified in F). In contrast suppression of the  
181 two transcription factors that form the AP1 complex downstream of JNK using dominant-  
182 negative variants Jun (*Jun<sup>DN</sup>*) and Fos (*Fos<sup>DN</sup>*) (Perkins, Dailey et al. 1988) did not have any  
183 effect (Fig. S2I-J, quantified in L). In agreement, *Jun<sup>DN</sup>* and *Fos<sup>DN</sup>* did not reduce phospho-JNK  
184 (pJNK) levels, although *Fos<sup>DN</sup>* reduced the activity of the JNK-reporter construct to some extent  
185 (TRE.GFP, Fig. S2M-R', quantified in S and T). Altogether this suggests that *Idgf3* protein  
186 levels are regulated downstream of JNK either independently of transcriptional regulation  
187 through JUN/FOS or in a redundant manner.

188 To further characterize *Idgf3* regulation, we asked whether the reduction of *Idgf3::GFP*  
189 intensity was due to transcriptional regulation. ISH revealed a substantial reduction of  
190 endogenous *Idgf3* transcript levels in *JNK<sup>KD</sup>;Ras<sup>VI2</sup>* (Fig. 2G-H) glands, and a weaker signal in  
191 *JNK<sup>DN</sup>;Ras<sup>VI2</sup>* (Fig. S2U-X) SGs, which was also confirmed using qPCR (Fig. S2Y).

192 Having observed that *Idgf3* transcript levels were not affected by *Grnd-KD* or *Wgn-KD* (Fig.  
193 2G-I), we further investigated their involvement in activation of the JNK pathway in SGs.  
194 Using an anti-JNK phosphorylation antibody and the JNK reporter construct as readouts, the  
195 signal was significantly reduced in *Grnd-KD* and *Wgn-KD*, in comparison to *WT* glands (Fig.  
196 2K-M', quantified in Q, R). However, in contrast to *Ras<sup>VI2</sup>* SGs, *Grnd-KD* did not reduce pJNK  
197 signaling, and *Wgn-KD* led only to a slight reduction ( $p < 0.029$ , Fig. 2N-P', quantified in Q, R)  
198 (Kanda, Igaki et al. 2002, Andersen, Colombani et al. 2015). The TRE signal was not affected  
199 by either KD (Fig. 2D, F). We substantiated these data with qPCR, which confirmed efficient

200 KD of *Grnd* and *Wgn* in *Grnd-KD;Ras<sup>V12</sup>* and *Wgn-KD;Ras<sup>V12</sup>*, respectively. However, the  
 201 levels of JNK target genes, *Puc* and *MMP*, were not affected. In line with the ISH, *Idgf3* levels  
 202 did not change either (Fig. S2Z). Collectively, this suggests that in *Ras<sup>V12</sup>* driven dysplastic  
 203 glands, *Grnd* and *Wgn* do not activate the canonical JNK-pathway. Instead, they contribute to  
 204 *Idgf3* regulation at the post-transcriptional level. Several scenarios could explain these  
 205 observations (i) disruption of the secretory machinery may inhibit canonical JNK activation  
 206 (Palmerini, Monzani et al. 2021), (ii) an alternative JNK-activating signaling pathway may be  
 207 activated by *Ras<sup>V12</sup>* (Wu, Chen et al. 2015, Krautz, Khalili et al. 2020) or (iii) disruption of cell  
 208 polarity prevents proper JNK signaling (Zhu, Xin et al. 2010).

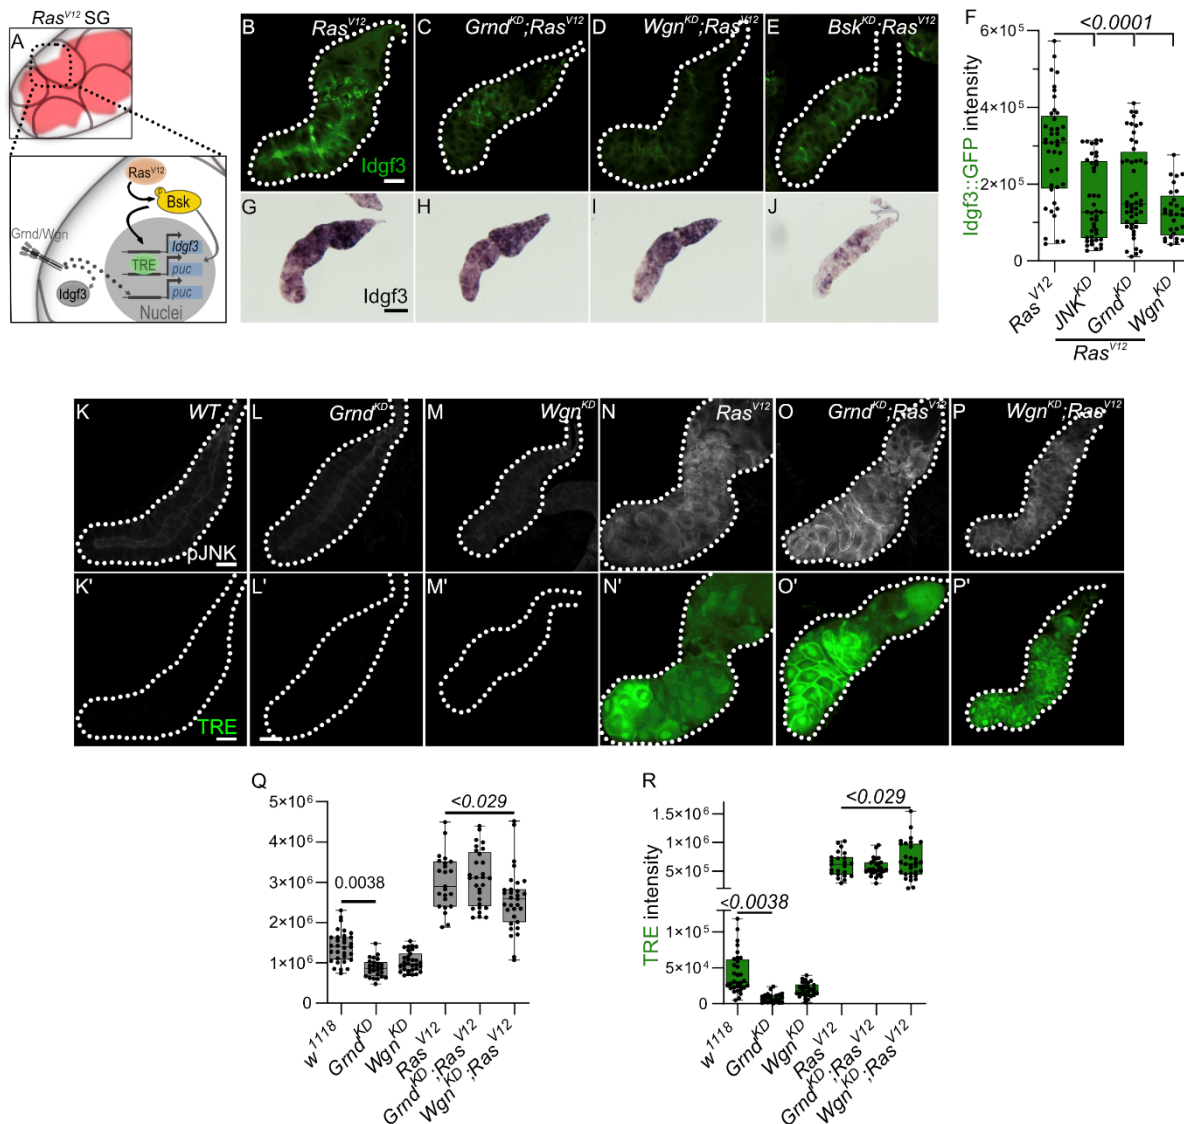

209

## 210 **Figure 2 Idgf3 dysplasia is mediated through JNK activity**

211 (A) Non-canonical JNK mediated *Idgf3* induction.

212 (B-E) Representative images of *Idgf3::GFP* in a JNK targeted screen (see Fig. S2 for the  
 213 complete survey).

214 (F) Quantification showing *Idgf3::GFP* intensity was reduced by *Grnd-KD*, *Wgn-KD* and *JNK-*  
 215 *KD* in *Ras<sup>V12</sup>* SG.

216 (G-I) *In-situ hybridization* showing reduced transcript abundance for *Idgf3* in *JNK-KD;Ras<sup>V12</sup>*  
 217 SG.

218 (K-P') pJNK staining and TRE reporter construct showing non-canonical JNK signaling in  
219 *Ras<sup>V12</sup>* SG.

220 (Q-R) pJNK and TRE intensity quantification indicating strong intensity in *Grnd-KD;Ras<sup>V1</sup>* and  
221 *Wgn-KD;Ras<sup>V1</sup>* glands.

222 Scale bars in (B-E, K-P') represent 100  $\mu\text{m}$  and (G-I) 0.3 mm. Boxplot in (F,Q and R) represent  
223 at least 20 SG pairs. Whisker length min to max, bar represent median. P-value quantified with  
224 Student's t-test.

225

226

## 227 **ROS promotes *Idgf3* induction via JNK**

228 To further dissect *Idgf3* regulation, we focused on the positive JNK regulators, reactive oxygen  
229 species (ROS) both intra- and extracellularly (Diwanji and Bergmann 2017, Perez, Lindblad et  
230 al. 2017). We previously reported that ROS production in *Ras<sup>V12</sup>* SGs increases via JNK (Fig.  
231 3A, (Krautz, Khalili et al. 2020)). To inhibit ROS intra- and extracellularly, we separately  
232 overexpressed the H<sub>2</sub>O<sub>2</sub> scavengers Catalase (Cat) and a secreted form of Catalase, IRC  
233 (immune-regulated Catalase), and the O<sub>2</sub><sup>-</sup> scavenger SODA (Superoxide dismutase A), in the  
234 *Ras<sup>V12</sup>* background and quantified *Idgf3::GFP* intensity. Reducing levels of intracellular H<sub>2</sub>O<sub>2</sub>  
235 (*Cat-OE*), but not O<sub>2</sub><sup>-</sup> (*SODA-OE*) lowered *Idgf3::GFP* intensity (Fig. S3A-D, quantified in  
236 S3E). Similarly, reduction of extracellular H<sub>2</sub>O<sub>2</sub> by the secreted version of Catalase lowered  
237 *Idgf3::GFP* levels (Fig. 3B-E, quantified in F). Similar to the reduced tissue size and improved  
238 tissue integrity in *Idgf3-KD;;Ras<sup>V12</sup>* SGs, overexpression of *IRC* in *Ras<sup>V12</sup>* SGs also reduced SG  
239 size (Fig. S3F), improved tissue integrity and restored the SG lumen (Fig. 3R-V). In order to  
240 discriminate *Idgf3* post- and transcriptional regulation, we performed qPCR on *IRC-OE;Ras<sup>V12</sup>*  
241 SGs and found a significantly lower level of *Idgf3* (Fig. 3K) in comparison to *Ras<sup>V12</sup>*. The *Idgf3*  
242 reduction was only detectable in *IRC-OE;Ras<sup>V12</sup>* glands since ISH on SGS detected similar  
243 levels of *Idgf3* transcripts in *CatA-OE;Ras<sup>V12</sup>* and *SodA-OE;Ras<sup>V12</sup>* in comparison to *Ras<sup>V12</sup>* SGs  
244 (Fig. 3G-J and S3G-L). Moreover, H<sub>2</sub>O<sub>2</sub> affected JNK target gene expression, indicating a  
245 global regulation of JNK. This suggests that ROS, specifically H<sub>2</sub>O<sub>2</sub>, are involved in the  
246 activation of *Idgf3* signaling and disruption of tissue integrity.



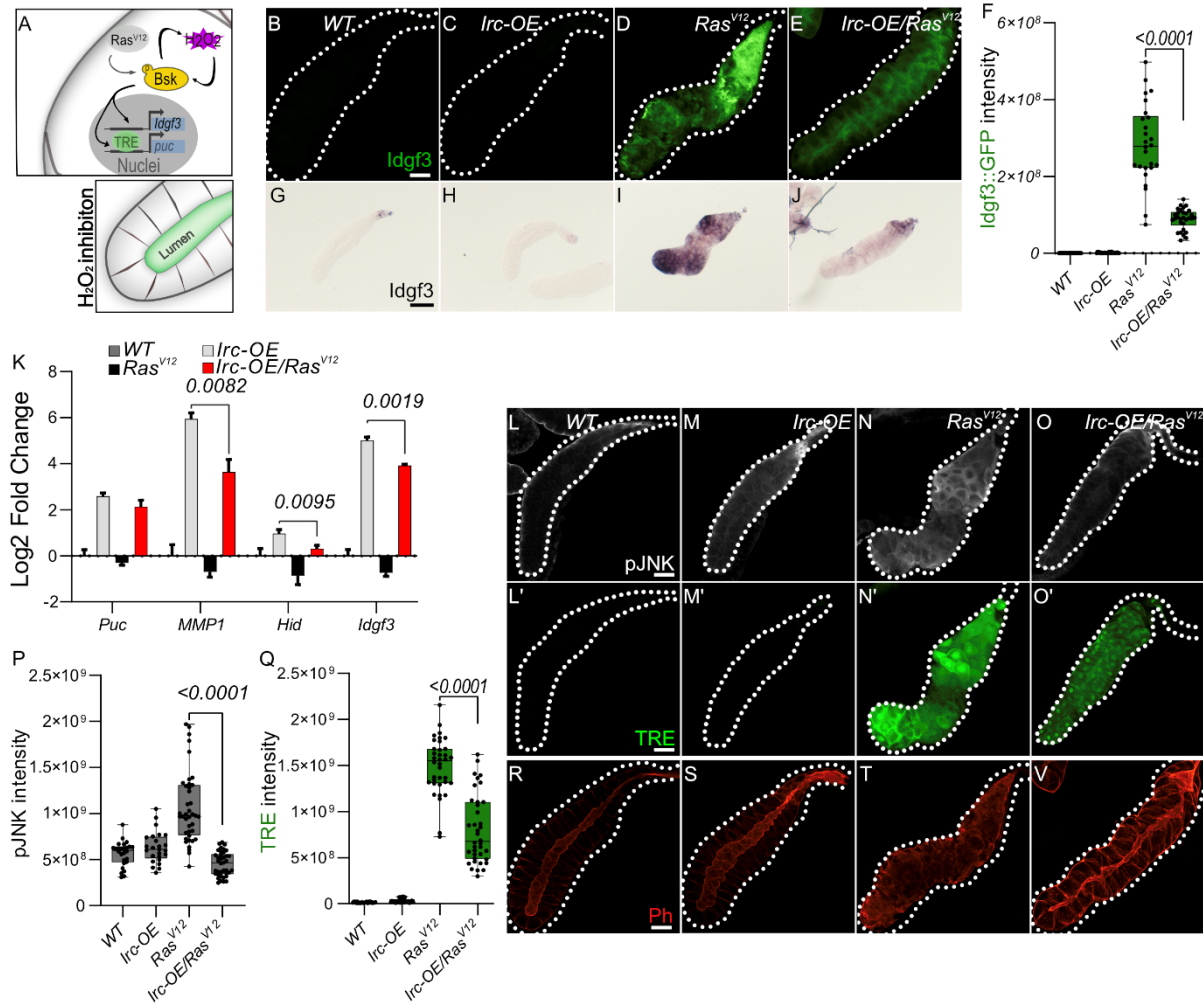

247

248 **Figure 3** *Idgf3* regulation feeds into a JNK-ROS feedback loop

249 (A)  $H_2O_2$ , regulates *Idgf3* expression through JNK.

250 (B-E) Reduction of  $H_2O_2$  by overexpression of secreted catalase (immune regulated catalase;

251 IRC) lowered *Idgf3*::GFP levels (Quantified in F).

252 (G-J) ISH showing reduced expression of *Idgf3* in *IRC-OE*;*Ras*<sup>V12</sup>glands.

253 (K) qPCR data showing reduction of *Idgf3*, *MMP1* and *Hid* in *IRC-OE*;*Ras*<sup>V12</sup>glands.

254 (L-O') pJNK staining and TRE reporter constructs showing reduced intensity in *IRC-*

255 *OE*;*Ras*<sup>V12</sup> in comparison to *Ras*<sup>V12</sup> glands, quantified in (P-Q).

256 (R-U) Phalloidin staining showing partially restored lumen in *IRC-OE*;*Ras*<sup>V12</sup> glands.

257 Scale bars in (B-J, L-U) represent 100  $\mu$ m. Data in (K) represent 3 independent replicas

258 summarized as mean  $\pm$  SD. Boxplot in (F,P-Q) represent at least 20 SG pairs. Whisker length

259 min to max, bar represent median. P-value quantified with Student's t-test.

260

261 ROS mediates JNK activation through a positive feedback loop (Perez, Lindblad et al. 2017).

262 Therefore we asked whether ROS induced *Idgf3* expression via the JNK-pathway. As done

263 previously, we addressed pJNK and TRE.GFP levels. Interestingly, all tested ROS scavengers

264 reduced pJNK levels (Fig. 3L-O, quantified in P, S3M-R, quantified in S) although TRE levels

265 were not influenced in *SOD-OE*;*Ras*<sup>V12</sup>, in contrast to *Cat-OE*;*Ras*<sup>V12</sup> and *IRC-OE*/*Ras*<sup>V12</sup> (Fig.

266 3L'-O', quantified in Q, S3M'-R', quantified in T). In summary, ROS contribute to the positive

267 regulation of pJNK. In addition, overexpression of extracellular but not intracellular Catalase

268 reduces Idgf3 induction via JNK, indicating that *Idgf3* might be regulated via the secretory  
269 pathway. Duox and Nox, present in secretory glands, are transmembrane proteins that may  
270 generate extracellular ROS (Faria and Fortunato 2020). Their conserved function has been  
271 shown to facilitate tumor progression but whether they play an important role in *Ras<sup>V12</sup>* SGs  
272 remains to be elucidated (Aggarwal, Tuli et al. 2019).

### 273 **Idgf3 accumulates in enlarged vesicles**

274 We previously noted the uneven distribution of Idgf3 in *Ras<sup>V12</sup>* SGs (Fig. 1D). To further  
275 understand how Idgf3 promotes dysplasia, we dissected its subcellular localization in different  
276 areas of the SGs (Fig. 4A). We stained the glands for F-actin (Phalloidin) and addressed  
277 Idgf3::GFP localization at high resolution (Fig. 4B-C'). Interestingly, we observed Idgf3::GFP  
278 clusters surrounded by F-actin (Fig. 4C-C': arrow). Using a different salivary gland driver (*AB-*  
279 *Gal4*) to drive expression of *Ras<sup>V12</sup>*, we also detected increased expression of Idgf3::GFP and  
280 localization within vesicle-like structures (Fig. S4A-B: arrow). The size of the vesicle-like  
281 structure was between 10-43  $\mu\text{m}$  in comparison to secretory *Drosophila* vesicles (3-8 $\mu\text{m}$ , Fig.  
282 4D, (Tran and Ten Hagen 2017)). We refer to these as enlarged vesicles (EnVs). Based on the  
283 increased Idgf3 levels, we wondered whether the protein was aggregating in EnVs. The  
284 aggregation marker, p62 (*Drosophila* Ref(2)P, (Bartlett, Isakson et al. 2011) detected signals  
285 throughout the cytoplasm of *Ras<sup>V12</sup>* SGs. In contrast, EnVs did not display any signs of  
286 aggregated proteins (Fig. S4C-D').

287 Since we had observed a loss of secretion in *Ras<sup>V12</sup>* SGs we next addressed the presence of EnVs  
288 within the secretory pathway. We overexpressed two versions of human phosphatidylserine  
289 binding protein, MFG-E8 (Milk fat globule-EGF factor), without (referred to as non-secreted:  
290 Fig. 4F-F', I-I') and with a signal peptide (referred to as secreted: Fig. 4G-G', J-J', (Asano, Miwa  
291 et al. 2004)). In the controls, the non-secreted MFG-E8 was found in the cytoplasm, whereas  
292 the secreted version was detected in both the cytoplasm and in the lumen (Fig. 4F-G'). In *Ras<sup>V12</sup>*  
293 SGs, the non-secreted form was surrounding the EnVs (arrow), indicating the presence of  
294 phosphatidylserine on their membrane (Fig. 4I-I'). In contrast, the secreted form localized to  
295 the EnVs (Fig. 4J-J': arrow). These data suggest that (1) EnVs are surrounded by a lipid  
296 membrane and (2) EnVs likely derive from the secretory pathway.

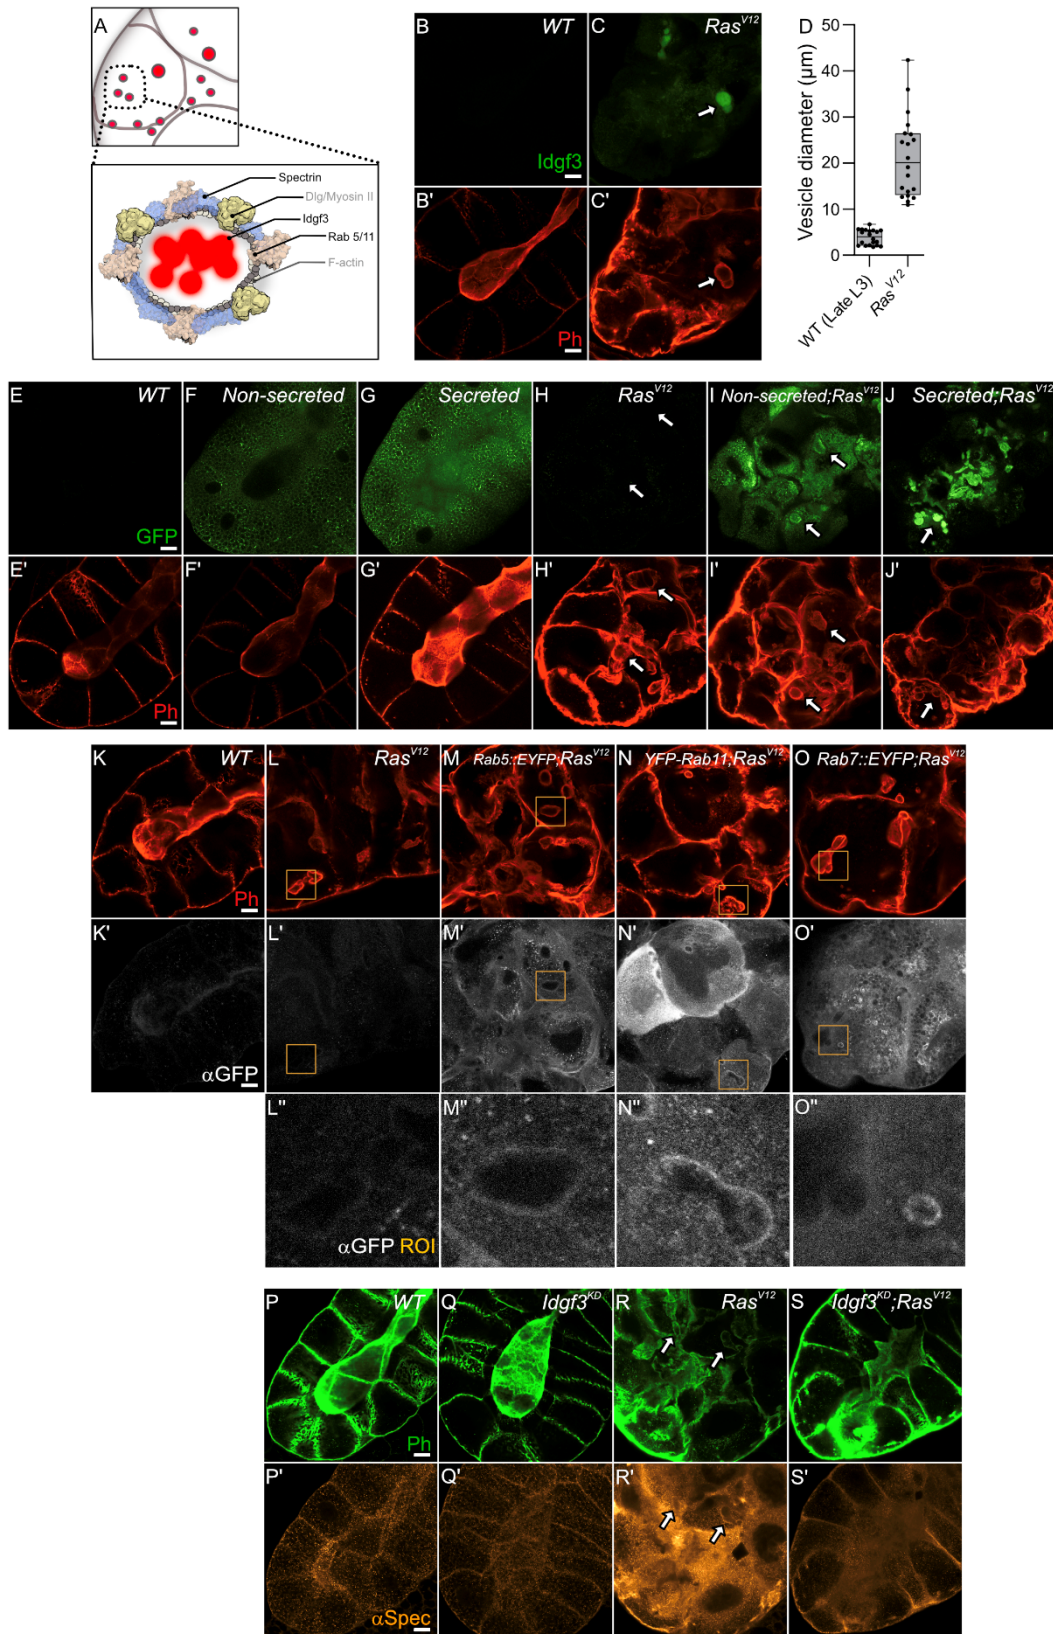

297

298 **Figure 4** *Idgf3* promotes formation of enlarged endosomes

299 (A) *Idgf3* enclosed by enlarged endosomes coated by cytoskeletal and cell polarity proteins.

300 (B-C') *Idgf3*::GFP clusters coated with Phalloidin.

301 (D) Vesicle size quantification showing *Ras*<sup>V12</sup> enlarged vesicles in comparison to prepupae SG

302 vesicles.



303 (E-J') Non secreted MFGE8 localizes to the surface of EnVs, co-stained with phalloidin. The  
304 secreted MFGE8 is packaged into EnVs in *Ras*<sup>V12</sup>glands.  
305 (K-O'') Vesicle markers showing positively stained EnVs when detecting Rab5 and Rab11 but  
306 not Rab7.  
307 (P-S')  $\alpha$ Spectrin staining showing restoration of normal distribution in *Idgf3-KD;Ras*<sup>V12</sup>glands.  
308 Scale bars in (B-C', E-J', K-O'' and P-S') represent 20  $\mu$ m. Boxplot in (D) represent 20 EnVs.  
309 Whisker length min to max, bar represent median.

310  
311 In order to further characterize *Idgf3*-positive EnVs we co-expressed vesicle-specific Rab's  
312 coupled with a GFP fluorophore, an autophagolysosomal marker (*Atg8*), an autophagy marker  
313 (*Vps35*), and a marker for phosphatidylinositol-3-phosphate-(*PtdIns3P: FYVE*)-containing  
314 endosomes in *Ras*<sup>V12</sup> glands (For a complete set see Fig. S4I-Q"). To increase sensitivity, we  
315 stained with anti-GFP and co-stained with Phalloidin. Localization of Rabs and phalloidin to  
316 the same vesicles was observed with Rab5 and Rab11 but not Rab7 (Fig. 4K-O'). Moreover,  
317 the EnVs were also positive for *PtdIns3P* (Fig. S4P-P"). In line with their dependence on  
318 secretion, this potentially identifies EnVs as enlarged recycling endosomes. EnV accumulation  
319 in *Ras*<sup>V12</sup> glands between 96 h and 120 h implies that (i) early endosome formation and fusion  
320 are either increased compared to *WT* or (ii) that recycling endosomes are not normally fused  
321 back to the apical membrane leading to their intracellular accumulation (Fig. S4E-H"). The  
322 latter hypothesis correlates with the loss of apico-basolateral polarity and the disruption of  
323 secretion due to a lack of a luminal structure ((Khalili, Kalcher et al. 2021) and Fig. S4E''-H").  
324 To test the first hypothesis, we blocked the formation of early endosomes with *Rab5*<sup>DN</sup>. Apico-  
325 basolateral polarity, detected by a visible lumen, was not affected by *Rab5*<sup>DN</sup>. Moreover,  
326 *Rab5*<sup>DN</sup>;*Ras*<sup>V12</sup> did not block EnV formation and restoration of apicobasal polarity (Fig. S4R-U:  
327 arrow). Halting the recycling endosome pathway via *Rab11*<sup>DN</sup> increased endosome  
328 accumulation without affecting cell polarity (Fig. S4V: arrow). In contrast, in *Rab11*<sup>DN</sup>;*Ras*<sup>V12</sup>  
329 SGs, endosomes were not accumulating, and EnVs were still detected (Fig. S4W).Taken  
330 together, EnV formation is independent of the classical recycling pathway, suggesting other  
331 candidates are involved in the generation of EnVs.

332

### 333 ***Idgf3* promotes loss of cell polarity via $\alpha$ -Spectrin positive enlarged endosomes**

334 Spectrins, cytoskeletal proteins which form a cortical network, have been shown to also play a  
335 role in secretion, cellular homeostasis and cell polarity (Tjota, Lee et al. 2011, Lattner, Leng et  
336 al. 2019) all of which were affected in *Ras*<sup>V12</sup>-SGs (Khalili, Kalcher et al. 2021). Therefore, we  
337 stained for  $\alpha$ Spectrin, one of the three members of the spectrin family (Williams, Smith et al.  
338 2003) and found it to localize to the EnVs (Fig. 4SX-Y'''). Moreover, we found markers for  
339 cell polarity including Dlg and Myosin II to also co-localize with the EnVs (Fig. S4Z—AC':  
340 arrow). Finally, we asked whether *Idgf3* in *Ras*<sup>V12</sup> SGs was responsible for EnV formation and  
341 mislocalization of  $\alpha$ Spectrin and found that indeed, *Idgf3-KD;Ras*<sup>V12</sup> glands lacked EnVs, and  
342  $\alpha$ Spectrin distribution was partially restored (Fig 4Q-T').

343 Taken together, *Idgf3* promotes EnV formation and disruption of cellular integrity, assessed by  
344 mislocalization of  $\alpha$ Spectrin, Dlg and Myosin II.

345 **Rac1 promotes the formation of EnVs via  $\alpha$ Spectrin**

346 In SGs, overexpression of Rac generates enlarged vesicles coated with Spectrin (Lee and  
347 Thomas 2011) with similarity to the EnVs described here. Therefore, we sought to investigate  
348 the role of the Rac1 pathway in *Ras<sup>V12</sup>* glands (Fig. 5A). Supporting a role in dysplasia, *Ras<sup>V12</sup>*  
349 glands stained with Rac1 showed a stronger staining in comparison to the control. Moreover,  
350 we observed Rac1 localized to EnVs (Fig. 5B-C'). To further assess Rac1's role in dysplasia  
351 we overexpressed *Rac1*. Surprisingly, *Rac1-OE* alone was sufficient to induce *Idgf3*, an effect  
352 that was not increased in *Rac1-OE;Ras<sup>V12</sup>* (Fig. 5D-E, I-J). Due to the pleiotropic effects of the  
353 *Rac1<sup>DN</sup>* construct, we addressed Rac1 function by modulating the expression of the Rac1  
354 effector molecule, *Pak* (Lee and Thomas 2011). *Pak-KD;Ras<sup>V12</sup>* did not reduce *Idgf3* levels but  
355 improved the histology of the gland (Fig. 5I,K). Conversely, overexpression of *Pak<sup>CA</sup>* did not  
356 increase *Idgf3* levels and had no detectable effect on F-actin distribution (Fig S5A-C''). In  
357 contrast, Rac1 activity via Pak does affect *Ras<sup>V12</sup>* SG integrity: *Idgf3::GFP* levels were increased  
358 in *Rac1-OE* SGs and F-actin was disorganized (Fig. S5D-F'', quantified in I). However, the  
359 *Rac1-OE* glands did not grow larger compared to *Ras<sup>V12</sup>*, indicating additional signals are  
360 necessary for gland overgrowth. Also, *Pak-KD;Ras<sup>V12</sup>* SGs displayed a more regular F-actin  
361 distribution leading to restoration of the lumen and proper secretion of *Idgf3* (Fig. S5G-H'').



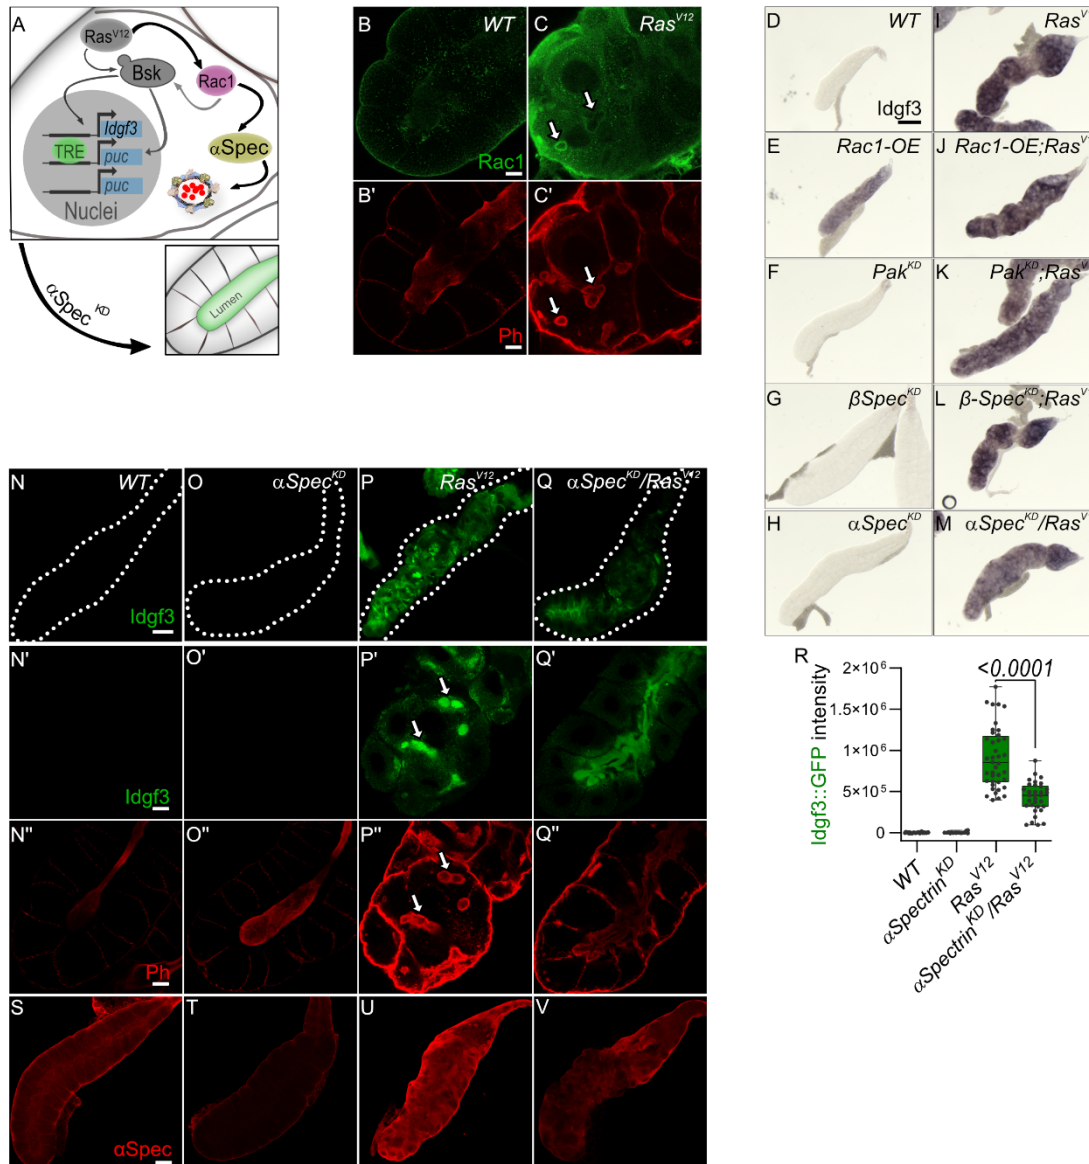

362

363 **Figure 5 Rac1 promotes EnVs formation through αSpectrin?**

364 (A) Redistribution of the spectrin-based membrane skeleton (SBMS) facilitates loss of cell  
365 polarity through Idgf3 packed EnVs.

366 (B-C') Rac1 staining showing EnVs co-localizing with Phalloidin.

367 (D-M) ISH showing increased Idgf3 staining in *Rac1-OE* glands. Improved tissue structure in  
368 *Pak-KD; Ras<sup>V12</sup>* and *αSpectrin-KD/Ras<sup>V12</sup>* glands did not affect Idgf3 expression in comparison  
369 to *Ras<sup>V12</sup>*.

370 (N-V) Reduced levels of αSpectrin (*αSpectrin-KD /Ras<sup>V12</sup>*) reduces Idgf3::GFP levels  
371 quantified in (R) prevents formation of EnVs and largely restores the SG lumen (arrows indicate  
372 EnVs). αSpectrin staining (S-V) is quantified in (S5V).

373 Scale bars in (B-C' and N'-Q'') represent 20 μm, (D-M) 0.3 mm and (N-Q and S-V) 100 μm.  
374 Boxplot in (R) represent at least 20 SG pairs. Whisker length min to max, bar represent median.  
375 P-value quantified with Student's t-test.

376

377 To further characterize the Rac1 pathway, we asked whether the downstream components β-  
378 *Spec* and α*Spec* affected Idgf3 transcript levels in *Ras<sup>V12</sup>* glands. Idgf3-specific ISH of β-*Spec*-  
379 *KD; Ras<sup>V12</sup>* or α*Spec-KD/Ras<sup>V12</sup>* showed that this was not the case. However, SG histology

380 improved in  $\alpha$ Spec-KD/Ras<sup>V12</sup> (Fig 5I, L-M). Therefore, we further looked into  $\alpha$ Spec-  
381 KD/Ras<sup>V12</sup> and its effect on F-actin organization and noted a similar effect as in *Pak-KD;Ras<sup>V12</sup>*  
382 (Fig 5N-Q'), namely that Idgf3::GFP levels were reduced. However, most of the Idgf3::GFP  
383 signal was detectable in the lumen (Fig. 5Q-Q', quantified in R). The ISH was substantiated  
384 with qPCR which showed increased levels of *Idgf3* in *Rac1-OE*, slightly increased levels in  
385 *Pak<sup>CA</sup>*, whereas  $\alpha$ Spec-KD/Ras<sup>V12</sup> showed a slight reduction (Fig. S5J). Moreover, JNK target  
386 genes, such as *Puc* and *Grnd* were upregulated in *Rac1-OE* and to some extent in *Pak<sup>CA</sup>* (Fig.  
387 S5J). Supporting regulation of JNK target genes via JNK, *Rac1-OE* showed higher TRE level  
388 compared to *Pak<sup>CA</sup>* (Fig. S5K-M'', quantified in N and O). Interestingly,  $\alpha$ Spec-KD/Ras<sup>V12</sup>  
389 reduced JNK and TRE levels (Fig S5P-S, quantified in T and U) without affecting JNK target  
390 genes (Fig. S5J). In summary, *Rac1-OE* was sufficient to induce *Idgf3* in salivary glands.  
391 However, in *Ras<sup>V12</sup>* SGs, additional signals contribute to *Idgf3* regulation. This is most likely  
392 due to additional effectors feeding into JNK signaling. Our data suggest, downregulation and  
393 upregulation of the JNK pathway may have different outcomes at the transcriptional and post-  
394 transcriptional level. Nevertheless,  $\alpha$ Spectrin promotes EnV formation in *Ras<sup>V12</sup>* SGs, disrupts  
395 polarity, proper secretion, and localization of Idgf3.

### 396 **JNK promotes EnV formation via Idgf3 upstream of $\alpha$ Spectrin**

397 The data presented here suggest that Idgf3 promotes EnV formation (Fig. 4R-S). Moreover,  
398 this likely occurs post-transcriptionally (Fig. S6A) since *Idgf3-KD;Ras<sup>V12</sup>* did not lead to  
399 reduced expression of  *$\alpha$ Spectrin*. In contrast, at 96 hours, overexpression of Idgf3 throughout  
400 the whole gland, as shown by ISH (Fig. S6B-E), led to an increase in the number of glands with  
401 endosomes (Fig. S6F-I''', quantified in J). The observed activation of  $\alpha$ Spec via Idgf3  
402 prompted us to investigate the epistasis between JNK, Idgf3, Rac1, and  $\alpha$ Spec. First, we  
403 addressed epistasis between Idgf3 and JNK since blocking JNK function by expressing a  
404 dominant-negative form (*Bsk<sup>DN</sup>*) resulted in restoration of apical-basal polarity (Fig. S6F-G).  
405 We calculated the penetrance of EnVs formation when we blocked JNK and overexpressed  
406 *Idgf3* (*Idgf3-OE*). In *Ras<sup>V12</sup>* SGs we observed EnVs in 100 % of the glands, an effect that was  
407 strongly blocked in *JNK<sup>DN</sup>;Ras<sup>V12</sup>* (Fig. 6 F-G, quantified in K). Blocking JNK and  
408 overexpressing *Idgf3* in *Ras<sup>V12</sup>* strongly reverted the *JNK<sup>DN</sup>;Ras<sup>V12</sup>* phenotype - a lumen could  
409 not be detected, and around 98% of the glands contained enlarged endosomes (Fig. 6F,I,  
410 quantified in K). Overexpression of Idgf3 alone did not result in EnV formation (Fig. 6B-E). In  
411 conclusion, the data suggest that Idgf3 acts downstream of JNK and through formation of EnV's  
412 which disrupts luminal integrity.

413  $\alpha$ Spectrin has been shown to act downstream of Rac1 (Lee and Thomas 2011). With our *Bx*  
414 driver, we could reproduce this epistasis. *Rac1-OE* was sufficient to interfere with apicobasal  
415 polarity without forming detectable EnVs, and this phenotype was reverted in *Rac1-OE; $\alpha$ Spec-*  
416 *KD* (Fig. S6K-O). In order to find out whether the same epistasis takes place between Rac1 and  
417  $\alpha$ Spectrin in *Ras<sup>V12</sup>* glands, we investigated luminal integrity. In *Rac1-OE; $\alpha$ Spec-KD/Ras<sup>V12</sup>*,  
418 partial restoration of the lumen was observed, indicating that apicobasal polarity improved (Fig.  
419 S6 L, P-Q). Moreover, *Pak-KD;Ras<sup>V12</sup>* showed lower  $\alpha$ Spectrin levels in comparison to *Ras<sup>V12</sup>*  
420 (Fig. S6S,W quantified in Y). This suggests that  $\alpha$ Spectrin acts downstream of Rac1 in *Ras<sup>V12</sup>*  
421 glands.

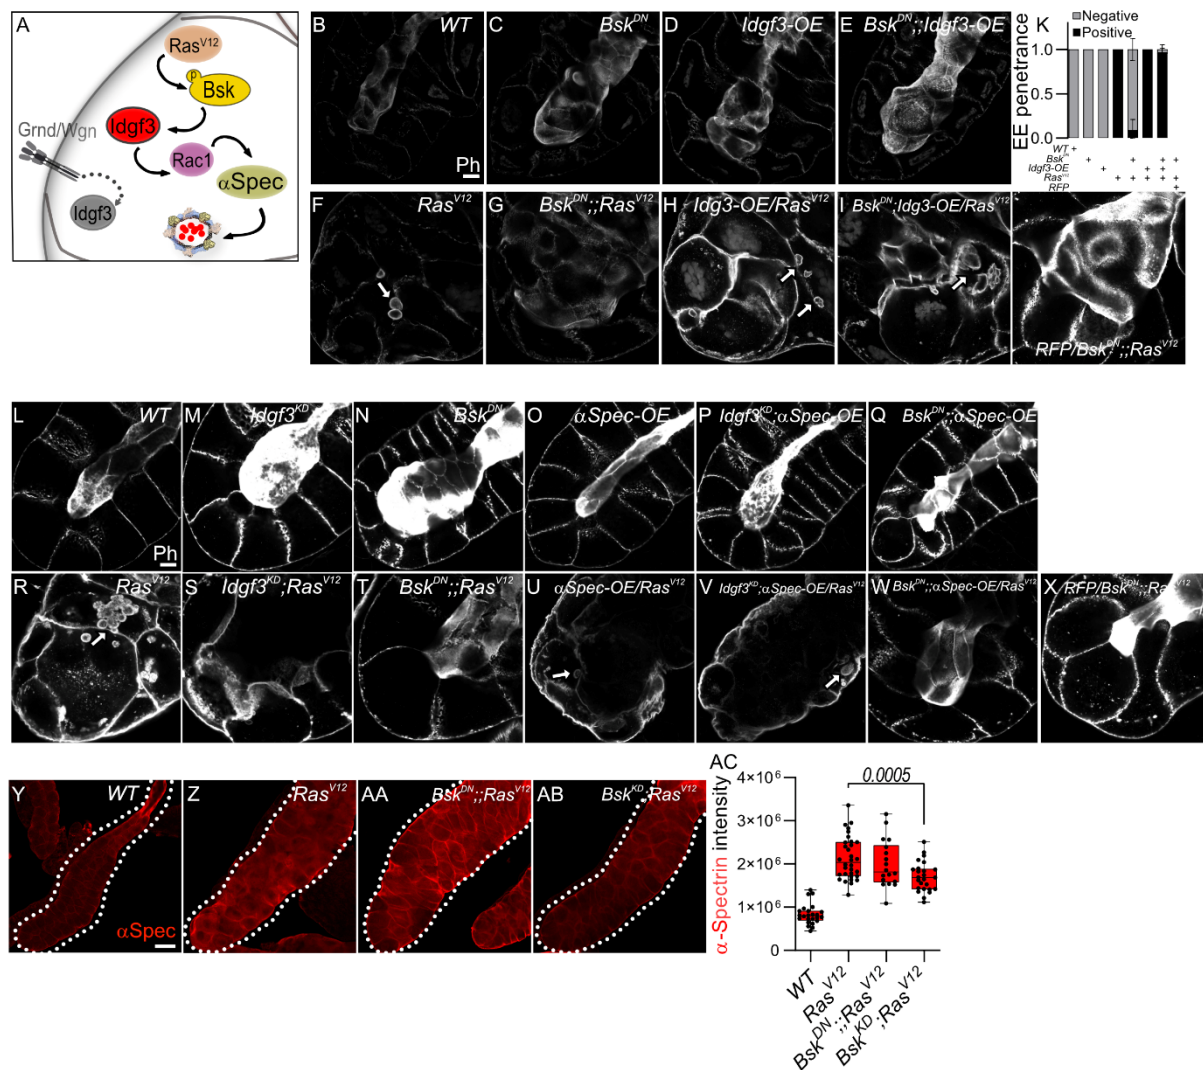

422

423 **Figure 6 Idgf3 promotes activation of Rac1 and loss of cell polarity through  $\alpha$ Spectrin**

424 (A) Idgf3 promotes formation of EnVs, upstream of Rac1.

425 (B-J) Phalloidin staining showing epistasis of EnVs formation in which Idgf3 acts downstream

426 of JNK.

427 (K) EnVs penetrance quantification showing a strong induction of EnVs in  $JNK^{DN}; Idgf3-$

428  $OE/Ras^{V12}$  glands.

429 (L-X) Epistatic analysis between Idgf3 and  $\alpha$ Spectrin. Phalloidin staining showing EnVs

430 presence in  $Idgf3-KD; \alpha Spec-OE/Ras^{V12}$ .

431 (Y-AB)  $\alpha$ Spectrin levels were reduced in  $JNK-KD; Ras^{V12}$  in comparison to  $Ras^{V12}$  but not in

432  $JNK^{DN}; Ras^{V12}$  glands, quantified in (AC).

433 Scale bars in (B-J and L-X) represent 20  $\mu m$  and (Y-AB) 100  $\mu m$ . Barplot in (K) represent 3

434 independent replicas with at least 10 SG pairs, summarized a mean  $\pm$  SD. Boxplot in (AC)

435 represent at least 19 SG pairs. Whisker length min to max, bar represent median. P-value

436 quantified with Student's t-test.

437

438 To further dissect the epistasis between JNK-Idgf3 and Rac1- $\alpha$ Spectrin in  $Ras^{V12}$  glands, we

439 addressed the relationship between Idgf3 and  $\alpha$ Spectrin by addressing luminal integrity. As

440 previously described,  $Idgf3-KD; Ras^{V12}$  SGs showed a partially restored lumen, an indication of

441 an improved apicobasal polarity (Fig. 6R-S). Moreover, the glands displayed lower  $\alpha$ Spectrin

442 levels in comparison to *Ras<sup>V12</sup>* (Fig.4R-S). Conversely, *Idgf3-KD;αSpec-OE/ Ras<sup>V12</sup>* glands  
443 displayed weak F-actin staining and rounded cells containing EnVs (Fig. 6R,V). This suggests  
444 that  $\alpha$ Spec acts downstream of Idgf3. In contrast, *JNK<sup>DN</sup>;αSpec-OE/ Ras<sup>V12</sup>* SGs did not lose  
445 their polarity shown by F-actin staining, indicating that  $\alpha$ Spec acts upstream of JNK, a  
446 phenotype independent of the dilution of the driver (Fig. 6R,W-X).

447 The unexpected epistatic relationship between Idgf3 and  $\alpha$ Spectrin downstream of JNK (Fig.  
448 6L-X) led us to speculate whether the levels of JNK might play a role. Indeed, staining the  
449 gland for  $\alpha$ Spectrin showed no significant difference in the intensity between *Ras<sup>V12</sup>* and  
450 *JNK<sup>DN</sup>;Ras<sup>V12</sup>* (Fig. S6R-V, quantified in W). Conversely, when we used *JNK-KD* to diminish  
451 JNK levels, the levels of  $\alpha$ Spectrin were also reduced (in *JNK-KD;Ras<sup>V12</sup>*) when compared to  
452 *Ras<sup>V12</sup>* alone (Fig. 6Y-AB, quantified in AC). These data indicate a complex interaction between  
453 JNK levels and disruption of apicobasal polarity mediated by Idgf3 via  $\alpha$ Spectrin. In summary,  
454 Idgf3 promotes endosome formation via increased levels of  $\alpha$ Spec, and as a result, the SGs lose  
455 apicobasal polarity and overgrow.

456



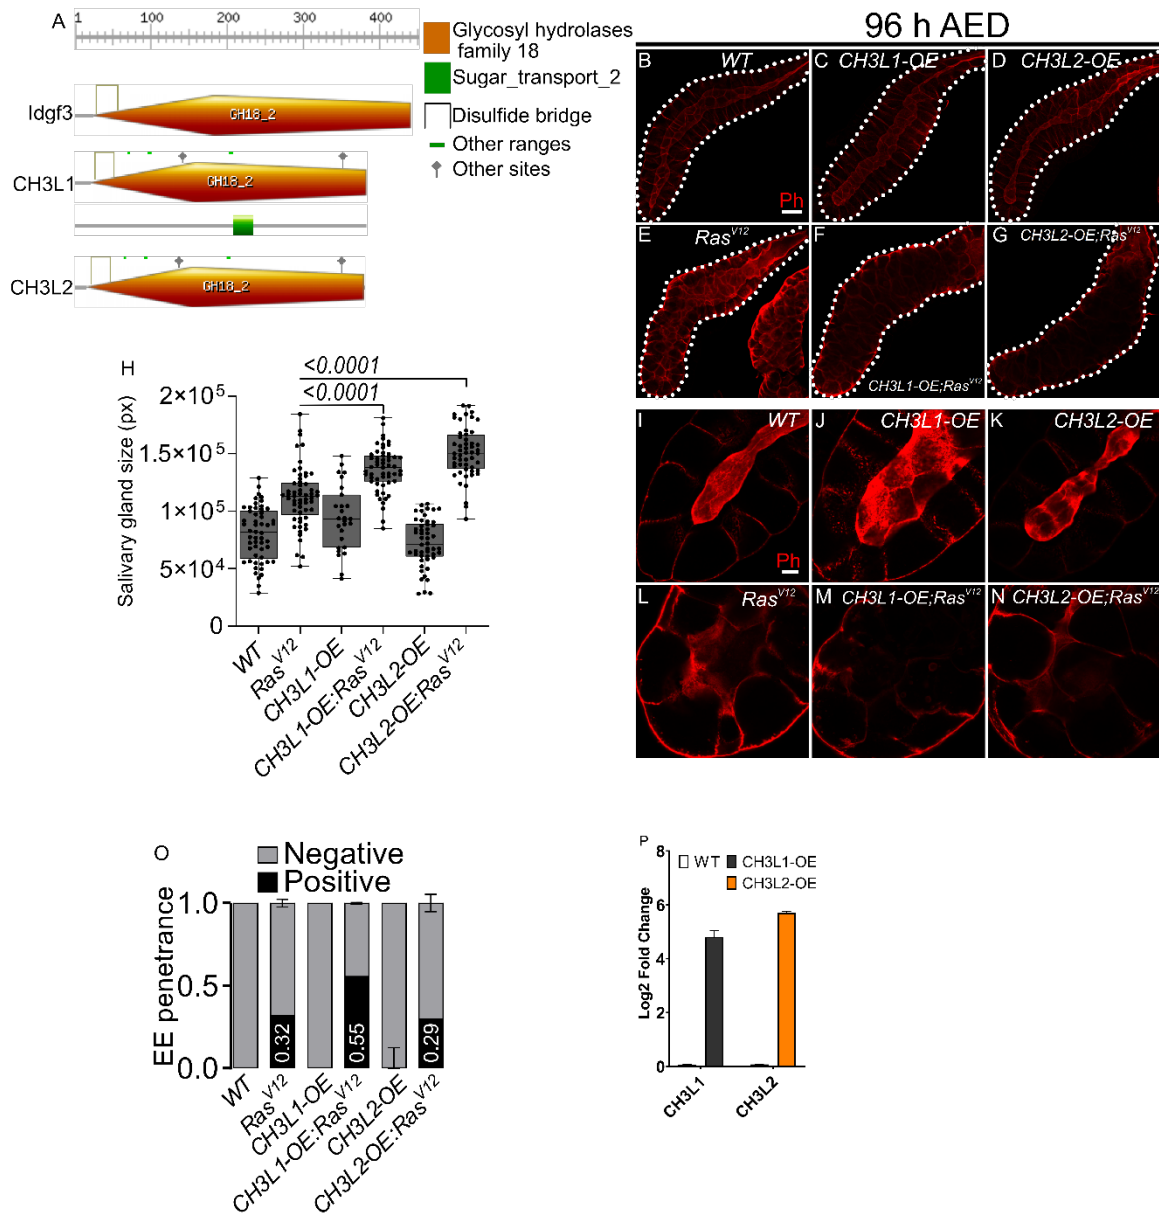

457

458

459 **Figure 7 Human Chitinase-like proteins similarly to Idgf3 promotes EnVs formation**

460 (A) Comparison of Idgf3, CH3L1 and CH3L2 protein motifs (<https://prosite.expasy.org>).

461 (B-G) Representative images of phalloidin staining used for size quantification.

462 (H) SG size quantification showing an increase in tissue size in CH3L1-OE;Ras<sup>V12</sup> and CH3L2-OE;Ras<sup>V12</sup> SG compared to Ras<sup>V12</sup> alone.

464 (I-N) Phalloidin staining depicting disrupted lumen integrity in Ras<sup>V12</sup> glands.

465 (O) EnVs penetrance quantification showing an induction of EnVs in CH3L1-OE;Ras<sup>V12</sup> glands.

466 (P) qPCR confirmation of CH3L1 and CH3L2 expression in SG.

467 Scale bars in (B-G) represent 100  $\mu$ m and (I-N) 20  $\mu$ m. Boxplot in (H) represent at least 19 SG

468 pairs. Whisker length min to max, bar represent median. P-value quantified with Student's t-

469 test. Barplot in (O) represent 3 independent replicas with at least 10 SG pairs, summarized as



470 mean  $\pm$  SD. Column chart in (P) represent 4 independent replicas with at least 10 SG pairs,  
471 summarized as mean  $\pm$  SD.

472

### 473 **Human CLP members enhance dysplasia in *Drosophila* SGs.**

474 Finally, we also wished to determine whether the tumor-modulating effects we had observed  
475 for *Drosophila* *Idgf3* also applied to human CLP members. For this we expressed two human  
476 CLPs (*Ch3L1* or *Ykl-40*; 29% AA identity and *Ch3L2* or *Ykl-39*; 26% AA identity, Fig. 7A) in  
477 SGs, both on their own and in combination with *Ras<sup>V12</sup>*. Similar to *Idgf3*, both CLPs enhanced  
478 the hypertrophy observed in *Ras<sup>V12</sup>* SGs (Fig. 7 B-K and O). Additionally, *Ch3L1* enhanced the  
479 prevalence of EnVs in the Ras mutant background. Taken together this means that the tumor-  
480 promoting effect of CLPs is conserved between *Drosophila* and humans and may affect  
481 different phenotypes of dysplasia depending on the CLP under study.

482

### 483 **Discussion**

484 The levels of Chitinase-like proteins (CLPs) are elevated during a wide range of inflammatory  
485 regenerative and neoplastic disorders. Their physiological function has been more elusive but  
486 includes regenerative processes such as the restoration of cell integrity after oxidative damage  
487 (Lee, Da Silva et al. 2011). Induction of CLPs has been associated with cancer development  
488 with poor prognosis (reviewed in (Zhao, Su et al. 2020)), but their role in ductal tumors is  
489 understudied. We used *Drosophila* as a tumor model to dissect CLP (*Idgf3*) function genetically  
490 in a highly secretory ductal organ, the salivary glands. We show that *Idgf3* promotes tumor  
491 overgrowth through the disruption of cell polarity. The tissue and cell-autonomous induction  
492 of *Idgf3* disrupts cell organization and leads to the formation of enlarged endosome vesicles  
493 (EnVs) that accumulate in the cytoplasm. Genetically, *Idgf3* is induced via a pro-tumorigenic  
494 JNK and ROS signaling feedback loop. Consequently, *Idgf3* disrupts the organization of the  
495 spectrin-based membrane skeleton (SBMS) through formation of EnVs via activation of Rac1.  
496 Significantly, KD of *Idgf3* inhibits overgrowth, restores cell polarity, and reduces ECM size  
497 and nuclear volume through blockage of EnV formation.

498 Our identification of a contribution of JNK signaling and both extra- and intracellular ROS to  
499 dysplasia is in line with previous findings from other *Drosophila* tumor models (Fogarty and  
500 Bergmann 2017). Similarly, we observe an amplification loop between ROS and JNK signaling,  
501 which augments the dysplastic phenotype ((Krautz, Khalili et al. 2020)). Several studies have  
502 demonstrated that activation of JNK signaling in mammals promotes the progression of ductal  
503 tumors (Yeh, Hou et al. 2006, Tang, Sun et al. 2013, Insua-Rodriguez, Pein et al. 2018). Here  
504 we identify *Idgf3* as an additional component that feeds into JNK signaling, possibly in a  
505 concentration dependent manner (Fig. 6). Ultimately in *Ras<sup>V12</sup>*-expressing SGs, this leads to the  
506 formation of EnVs involving Spectrins. Members of the Spectrin family have a supporting role  
507 in providing cellular architecture through interaction with phospholipids and actively  
508 promoting polymerization of F-actin (Juliano, Kimelberg et al. 1971, Pinder, Bray et al. 1975,  
509 Hardy and Schrier 1978). Moreover, the secretory activity of ductal organs has been shown to  
510 be facilitated by Spectrins (Lattner, Leng et al. 2019).

511 During *Drosophila* development and under physiological conditions, the pathway that involves  
512 Spectrins, Rac1 and Pak1 has been shown to be required for the maintenance of cell polarity  
513 while when deregulated, it leads to the formation of enlarged vesicles similar to the EnVs (Lee  
514 and Thomas 2011). Thus our results provide a possible link between the observed induction of  
515 CLPs in a range of tumors and the effects of Spectrins and their deregulation (Ackermann and  
516 Brieger 2019, Yang, Yang et al. 2021). In addition to the genetic interaction, previous work  
517 suggests a mechanical link between spectrins via a Spectrin binding protein Hssh3bp1 (Human  
518 spectrin Src homology domain binding protein1; (Ziennicka-Kotula, Xu et al. 1998)), the loss  
519 of which has been associated with prostatic tumors (Macoska, Xu et al. 2001). Hhh3bp1 may  
520 influence tumor progression possibly through interaction with tyrosine kinases such as Abelson  
521 tyrosine kinase (Macoska, Xu et al. 2001). Interestingly Hhh3bp1 is a marker and possible  
522 regulator of macropinocytosis, a recycling pathway that is known to be hijacked by Ras-  
523 transformed tumor cells to acquire nutrients (Recouvreux and Commisso 2017) and also leads  
524 to the formation of large intracellular vesicles. In favour of this hypothesis, macropinocytosis  
525 has been found to depend on Rac1/Pak1 signaling, although the resulting vesicles are usually  
526 smaller (0.2-5 micrometers) than EnVs (Maxson, Sarantis et al. 2021). We find that - like  
527 macropinocytosis - EnV-formation depends on the activity of growth factor receptors  
528 (Recouvreux and Commisso 2017), in this case Idgf3, much in line with its original description  
529 as an *in vitro* mediator of insulin signaling (Kawamura, Shibata et al. 1999). *In vivo*, under  
530 normal conditions, Idgf3 is required for proper formation of chitin-containing structures, wound  
531 healing and cellular integrity (Pesch, Riedel et al. 2016). Thus, under these circumstances Idgf3  
532 may help to preserve SG integrity including the epithelial character of SG cells upstream of  
533 spectrins. Conversely, in a non-physiological setting such as upon overexpression of *Ras*<sup>V12</sup>,  
534 this mechanism is overwhelmed leading to the breakdown of homeostasis, loss of cell polarity  
535 and the gland lumen, loss of secretory activity and the formation of EnVs larger than  
536 macropinocytic vesicles. In a mammalian setting, the associated phenotypes such as disruption  
537 of cellular polarity and reorganization of the ECM provide targets for therapeutic treatments  
538 (Insua-Rodriguez, Pein et al. 2018). Depending on the tissue environment, CLP's may have  
539 various roles in a context-dependent manner. Overexpression of *Idgf3* alone is not sufficient for  
540 the loss of cell polarity, growth, and fibrosis. Collectively, this suggests a tumor-specific  
541 phenotype for Idgf3 (Fig. 6B-J), similar to mammalian CLPs (reviewed in (Zhao, Su et al.  
542 2020)). In support for a phylogenetically conserved contribution of CLPs to tumor progression,  
543 we were able to recapitulate SG hypertrophy and EnV formation when we expressed two human  
544 CLPs in *Ras*<sup>V12</sup> SGs. Whether the differences we observe between the two human CLPs is due  
545 to their different structure awaits further work. Similarly, due to their pleiotropic effects, further  
546 investigation of the role of CLPs will be required to dissect their molecular function in a given  
547 tissue and to ultimately design tumor-specific treatments (Kzhyshkowska, Larionova et al.  
548 2019).

549 Taken together our findings provide new insight into the loss of tissue integrity in a neoplastic  
550 tumor model and provide targets to test how developmentally and physiologically important  
551 deregulated mechanisms contribute to tumor progression in certain forms of cancer.

552

## 553 **Acknowledgments**

554 We would like to thank Chris Molenaar, Roger Karlsson, Stina Höglund and the Imaging  
555 facility at Stockholm University for support with all aspects of microscopy. We would also  
556 like to thank Vasilios Tsarouhas for his critical feedback. This work was supported by grants  
557 from the Swedish Cancer Foundation (CAN 2015-546), the Wenner-Gren Foundation  
558 (UPD2020-0094 and UPD2021-0095 to MK) and the Swedish Research Council (VR 2016-  
559 04077 and VR 2021-04841).

560

## 561 **References**

562

- 563 Ackermann, A. and A. Brieger (2019). "The Role of Nonerythroid Spectrin alphaII in Cancer."  
564 J Oncol **2019**: 7079604.
- 565 Aggarwal, V., H. S. Tuli, A. Varol, F. Thakral, M. B. Yerer, K. Sak, M. Varol, A. Jain, M. A.  
566 Khan and G. Sethi (2019). "Role of Reactive Oxygen Species in Cancer Progression:  
567 Molecular Mechanisms and Recent Advancements." Biomolecules **9**(11).
- 568 Andersen, D. S., J. Colombani, V. Palmerini, K. Chakrabandhu, E. Boone, M. Rothlisberger, J.  
569 Toggweiler, K. Basler, M. Mapelli, A. O. Hueber and P. Leopold (2015). "The Drosophila  
570 TNF receptor Grindelwald couples loss of cell polarity and neoplastic growth." Nature  
571 **522**(7557): 482-486.
- 572 Archibald, A., C. Mihai, I. G. Macara and L. McCaffrey (2015). "Oncogenic suppression of  
573 apoptosis uncovers a Rac1/JNK proliferation pathway activated by loss of Par3." Oncogene  
574 **34**(24): 3199-3206.
- 575 Asano, K., M. Miwa, K. Miwa, R. Hanayama, H. Nagase, S. Nagata and M. Tanaka (2004).  
576 "Masking of phosphatidylserine inhibits apoptotic cell engulfment and induces autoantibody  
577 production in mice." J Exp Med **200**(4): 459-467.
- 578 Baek, S. H., Y. C. Kwon, H. Lee and K. M. Choe (2010). "Rho-family small GTPases are  
579 required for cell polarization and directional sensing in Drosophila wound healing."  
580 Biochem Biophys Res Commun **394**(3): 488-492.
- 581 Bartlett, B. J., P. Isakson, J. Lewerenz, H. Sanchez, R. W. Kotzebue, R. C. Cumming, G. L.  
582 Harris, I. P. Nezis, D. R. Schubert, A. Simonsen and K. D. Finley (2011). "p62, Ref(2)P and  
583 ubiquitinated proteins are conserved markers of neuronal aging, aggregate formation and  
584 progressive autophagic defects." Autophagy **7**(6): 572-583.
- 585 Bennett, V. and A. J. Baines (2001). "Spectrin and ankyrin-based pathways: metazoan  
586 inventions for integrating cells into tissues." Physiol Rev **81**(3): 1353-1392.
- 587 Brumby, A. M. and H. E. Richardson (2003). "scribble mutants cooperate with oncogenic Ras  
588 or Notch to cause neoplastic overgrowth in Drosophila." EMBO J **22**(21): 5769-5779.
- 589 Ciapponi, L., D. B. Jackson, M. Mlodzik and D. Bohmann (2001). "Drosophila Fos mediates  
590 ERK and JNK signals via distinct phosphorylation sites." Genes Dev **15**(12): 1540-1553.
- 591 Diwanji, N. and A. Bergmann (2017). "The beneficial role of extracellular reactive oxygen  
592 species in apoptosis-induced compensatory proliferation." Fly (Austin) **11**(1): 46-52.
- 593 Faria, C. C. and R. S. Fortunato (2020). "The role of dual oxidases in physiology and cancer."  
594 Genet Mol Biol **43**(1 suppl. 1): e20190096.
- 595 Fernandez-Medarde, A., J. De Las Rivas and E. Santos (2021). "40 Years of RAS-A Historic  
596 Overview." Genes (Basel) **12**(5).

- 597 Fletcher, G. C., A. Elbediwy, I. Khanal, P. S. Ribeiro, N. Tapon and B. J. Thompson (2015).  
598 "The Spectrin cytoskeleton regulates the Hippo signalling pathway." *EMBO J* **34**(7): 940-  
599 954.
- 600 Fogarty, C. E. and A. Bergmann (2017). "Killers creating new life: caspases drive apoptosis-  
601 induced proliferation in tissue repair and disease." *Cell Death Differ* **24**(8): 1390-1400.
- 602 Hardy, B. and S. L. Schrier (1978). "The role of spectrin in erythrocyte ghost endocytosis."  
603 *Biochem Biophys Res Commun* **81**(4): 1153-1161.
- 604 Igaki, T., R. A. Pagliarini and T. Xu (2006). "Loss of cell polarity drives tumor growth and  
605 invasion through JNK activation in Drosophila." *Curr Biol* **16**(11): 1139-1146.
- 606 Insua-Rodriguez, J., M. Pein, T. Hongu, J. Meier, A. Descot, C. M. Lowy, E. De Braekeleer,  
607 H. P. Sinn, S. Spaich, M. Sutterlin, A. Schneeweiss and T. Oskarsson (2018). "Stress  
608 signaling in breast cancer cells induces matrix components that promote chemoresistant  
609 metastasis." *EMBO Mol Med* **10**(10).
- 610 Johansen, J. S., B. V. Jensen, A. Roslind, D. Nielsen and P. A. Price (2006). "Serum YKL-40,  
611 a new prognostic biomarker in cancer patients?" *Cancer Epidemiol Biomarkers Prev* **15**(2):  
612 194-202.
- 613 Juliano, R. L., H. K. Kimelberg and D. Papahadjopoulos (1971). "Synergistic effects of a  
614 membrane protein (spectrin) and Ca<sup>2+</sup> on the Na<sup>+</sup> permeability of phospholipid vesicles."  
615 *Biochim Biophys Acta* **241**(3): 894-905.
- 616 Kanda, H., T. Igaki, H. Kanuka, T. Yagi and M. Miura (2002). "Wengen, a member of the  
617 Drosophila tumor necrosis factor receptor superfamily, is required for Eiger signaling." *J*  
618 *Biol Chem* **277**(32): 28372-28375.
- 619 Karlsson, C., A. M. Korayem, C. Scherfer, O. Loseva, M. S. Dushay and U. Theopold (2004).  
620 "Proteomic analysis of the Drosophila larval hemolymph clot." *J Biol Chem* **279**(50): 52033-  
621 52041.
- 622 Kawamura, K., T. Shibata, O. Saget, D. Peel and P. J. Bryant (1999). "A new family of growth  
623 factors produced by the fat body and active on Drosophila imaginal disc cells." *Development*  
624 **126**(2): 211-219.
- 625 Khalili, D., C. Kalcher, S. Baumgartner and U. Theopold (2021). "Anti-Fibrotic Activity of an  
626 Antimicrobial Peptide in a Drosophila Model." *J Innate Immun*: 1-15.
- 627 Khalili, D., C. Kalcher, S. Baumgartner and U. Theopold (2021). "Anti-Fibrotic Activity of an  
628 Antimicrobial Peptide in a Drosophila Model." *J Innate Immun* **13**(6): 376-390.
- 629 Kirkpatrick, R. B., R. E. Matico, D. E. McNulty, J. E. Strickler and M. Rosenberg (1995). "An  
630 abundantly secreted glycoprotein from Drosophila melanogaster is related to mammalian  
631 secretory proteins produced in rheumatoid tissues and by activated macrophages." *Gene*  
632 **153**(2): 147-154.
- 633 Krautz, R., D. Khalili and U. Theopold (2020). "Tissue-autonomous immune response regulates  
634 stress signalling during hypertrophy." *Elife* **9**.
- 635 Kucerova, L., O. I. Kubrak, J. M. Bengtsson, H. Strnad, S. Nylin, U. Theopold and D. R. Nassel  
636 (2016). "Slowed aging during reproductive dormancy is reflected in genome-wide  
637 transcriptome changes in Drosophila melanogaster." *BMC Genomics* **17**(1): 50.
- 638 Kzhyshkowska, J., I. Larionova and T. Liu (2019). "YKL-39 as a Potential New Target for  
639 Anti-Angiogenic Therapy in Cancer." *Front Immunol* **10**: 2930.
- 640 Lattner, J., W. Leng, E. Knust, M. Brankatschk and D. Flores-Benitez (2019). "Crumbs  
641 organizes the transport machinery by regulating apical levels of PI(4,5)P2 in Drosophila."  
642 *Elife* **8**.
- 643 Lee, C. G., C. A. Da Silva, C. S. Dela Cruz, F. Ahangari, B. Ma, M. J. Kang, C. H. He, S.  
644 Takyar and J. A. Elias (2011). "Role of chitin and chitinase/chitinase-like proteins in  
645 inflammation, tissue remodeling, and injury." *Annual review of physiology* **73**: 479-501.



- 646 Lee, S. K. and G. H. Thomas (2011). "Rac1 modulation of the apical domain is negatively  
647 regulated by beta (Heavy)-spectrin." *Mech Dev* **128**(1-2): 116-128.
- 648 Macoska, J. A., J. Xu, D. Ziemnicka, T. S. Schwab, M. A. Rubin and L. Kotula (2001). "Loss  
649 of expression of human spectrin src homology domain binding protein 1 is associated with  
650 10p loss in human prostatic adenocarcinoma." *Neoplasia* **3**(2): 99-104.
- 651 Maxson, M. E., H. Sarantis, A. Volchuk, J. H. Brumell and S. Grinstein (2021). "Rab5 regulates  
652 macropinocytosis by recruiting the inositol 5-phosphatases OCRL and Inpp5b that hydrolyse  
653 PtdIns(4,5)P2." *J Cell Sci* **134**(7).
- 654 Morera, E., S. S. Steinhauser, Z. Budkova, S. Ingthorsson, J. Krickler, A. Krueger, G. A.  
655 Traustadottir and T. Gudjonsson (2019). "YKL-40/CHI3L1 facilitates migration and  
656 invasion in HER2 overexpressing breast epithelial progenitor cells and generates a niche for  
657 capillary-like network formation." *In Vitro Cell Dev Biol Anim* **55**(10): 838-853.
- 658 Pagliarini, R. A. and T. Xu (2003). "A genetic screen in *Drosophila* for metastatic behavior."  
659 *Science* **302**(5648): 1227-1231.
- 660 Palmerini, V., S. Monzani, Q. Laurichesse, R. Loudhaief, S. Mari, V. Cecatiello, V. Olieric, S.  
661 Pasqualato, J. Colombani, D. S. Andersen and M. Mapelli (2021). "Drosophila TNFRs  
662 Grindelwald and Wengen bind Eiger with different affinities and promote distinct cellular  
663 functions." *Nat Commun* **12**(1): 2070.
- 664 Park, K. R., H. M. Yun, K. Yoo, Y. W. Ham, S. B. Han and J. T. Hong (2020). "Chitinase 3  
665 like 1 suppresses the stability and activity of p53 to promote lung tumorigenesis." *Cell*  
666 *Commun Signal* **18**(1): 5.
- 667 Perez, E., J. L. Lindblad and A. Bergmann (2017). "Tumor-promoting function of apoptotic  
668 caspases by an amplification loop involving ROS, macrophages and JNK in *Drosophila*."  
669 *Elife* **6**.
- 670 Perkins, K. K., G. M. Dailey and R. Tjian (1988). "Novel Jun- and Fos-related proteins in  
671 *Drosophila* are functionally homologous to enhancer factor AP-1." *EMBO J* **7**(13): 4265-  
672 4273.
- 673 Pesch, Y. Y., D. Riedel, K. R. Patil, G. Loch and M. Behr (2016). "Chitinases and Imaginal  
674 disc growth factors organize the extracellular matrix formation at barrier tissues in insects."  
675 *Sci Rep* **6**: 18340.
- 676 Pinder, J. C., D. Bray and W. B. Gratzer (1975). "Actin polymerisation induced by spectrin."  
677 *Nature* **258**(5537): 765-766.
- 678 Pinho, A. V., L. Chantrill and I. Rooman (2014). "Chronic pancreatitis: a path to pancreatic  
679 cancer." *Cancer Lett* **345**(2): 203-209.
- 680 Recouvreur, M. V. and C. Commisso (2017). "Macropinocytosis: A Metabolic Adaptation to  
681 Nutrient Stress in Cancer." *Front Endocrinol (Lausanne)* **8**: 261.
- 682 Roslind, A. and J. S. Johansen (2009). "YKL-40: a novel marker shared by chronic  
683 inflammation and oncogenic transformation." *Methods Mol Biol* **511**: 159-184.
- 684 Shao, R., K. Hamel, L. Petersen, Q. J. Cao, R. B. Arenas, C. Bigelow, B. Bentley and W. Yan  
685 (2009). "YKL-40, a secreted glycoprotein, promotes tumor angiogenesis." *Oncogene* **28**(50):  
686 4456-4468.
- 687 Tang, H., Y. Sun, Z. Shi, H. Huang, Z. Fang, J. Chen, Q. Xiu and B. Li (2013). "YKL-40  
688 induces IL-8 expression from bronchial epithelium via MAPK (JNK and ERK) and NF-  
689 kappaB pathways, causing bronchial smooth muscle proliferation and migration." *J Immunol*  
690 **190**(1): 438-446.
- 691 Tjota, M., S. K. Lee, J. Wu, J. A. Williams, M. R. Khanna and G. H. Thomas (2011). "Annexin  
692 B9 binds to beta(H)-spectrin and is required for multivesicular body function in *Drosophila*."  
693 *J Cell Sci* **124**(Pt 17): 2914-2926.
- 694 Tran, D. T. and K. G. Ten Hagen (2017). "Real-time insights into regulated exocytosis." *J Cell*  
695 *Sci* **130**(8): 1355-1363.



- 696 Uhlen, M., C. Zhang, S. Lee, E. Sjostedt, L. Fagerberg, G. Bidkhori, R. Benfeitas, M. Arif, Z.  
697 Liu, F. Edfors, K. Sanli, K. von Feilitzen, P. Oksvold, E. Lundberg, S. Hober, P. Nilsson, J.  
698 Mattsson, J. M. Schwenk, H. Brunnstrom, B. Glimelius, T. Sjoblom, P. H. Edqvist, D.  
699 Djureinovic, P. Micke, C. Lindskog, A. Mardinoglu and F. Ponten (2017). "A pathology  
700 atlas of the human cancer transcriptome." Science **357**(6352).
- 701 Wertheimer, E., A. Gutierrez-Uzquiza, C. Rosembli, C. Lopez-Haber, M. S. Sosa and M. G.  
702 Kazanietz (2012). "Rac signaling in breast cancer: a tale of GEFs and GAPs." Cell Signal  
703 **24**(2): 353-362.
- 704 Williams, S. T., A. N. Smith, C. D. Cianci, J. S. Morrow and T. L. Brown (2003). "Identification  
705 of the primary caspase 3 cleavage site in alpha II-spectrin during apoptosis." Apoptosis **8**(4):  
706 353-361.
- 707 Wu, C., C. Chen, J. Dai, F. Zhang, Y. Chen, W. Li, J. C. Pastor-Pareja and L. Xue (2015). "Toll  
708 pathway modulates TNF-induced JNK-dependent cell death in *Drosophila*." Open Biol **5**(7):  
709 140171.
- 710 Yadav, S. and I. Eleftherianos (2018). "The Imaginal Disc Growth Factors 2 and 3 participate  
711 in the *Drosophila* response to nematode infection." Parasite Immunol **40**(10): e12581.
- 712 Yang, P., Y. Yang, P. Sun, Y. Tian, F. Gao, C. Wang, T. Zong, M. Li, Y. Zhang, T. Yu and Z.  
713 Jiang (2021). "betaII spectrin (SPTBN1): biological function and clinical potential in cancer  
714 and other diseases." Int J Biol Sci **17**(1): 32-49.
- 715 Yeh, Y. T., M. F. Hou, Y. F. Chung, Y. J. Chen, S. F. Yang, D. C. Chen, J. H. Su and S. S.  
716 Yuan (2006). "Decreased expression of phosphorylated JNK in breast infiltrating ductal  
717 carcinoma is associated with a better overall survival." Int J Cancer **118**(11): 2678-2684.
- 718 Zeke, A., M. Misheva, A. Remenyi and M. A. Bogoyevitch (2016). "JNK Signaling: Regulation  
719 and Functions Based on Complex Protein-Protein Partnerships." Microbiol Mol Biol Rev  
720 **80**(3): 793-835.
- 721 Zhao, T., Z. Su, Y. Li, X. Zhang and Q. You (2020). "Chitinase-3 like-protein-1 function and  
722 its role in diseases." Signal Transduct Target Ther **5**(1): 201.
- 723 Zhu, M., T. Xin, S. Weng, Y. Gao, Y. Zhang, Q. Li and M. Li (2010). "Activation of JNK  
724 signaling links Igl mutations to disruption of the cell polarity and epithelial organization in  
725 *Drosophila* imaginal discs." Cell Res **20**(2): 242-245.
- 726 Ziemnicka-Kotula, D., J. Xu, H. Gu, A. Potempska, K. S. Kim, E. C. Jenkins, E. Trenkner and  
727 L. Kotula (1998). "Identification of a candidate human spectrin Src homology 3 domain-  
728 binding protein suggests a general mechanism of association of tyrosine kinases with the  
729 spectrin-based membrane skeleton." J Biol Chem **273**(22): 13681-13692.

730
