# 1 **Chitinase-like proteins promoting tumorigenesis through disruption of** 2 **cell polarity via enlarged endosomal vesicles.**

3 **Dilan Khalili<sup>1</sup>, Martin Kunc<sup>1</sup>, Sarah Herbrich<sup>1</sup>, Anna Mueller<sup>1</sup>, Ulrich Theopold<sup>1\*</sup>**

4 <sup>1</sup>The Wenner-Gren Institute, Department of Molecular Biosciences, Stockholm University,  
5 Stockholm, Sweden

6 **\* Correspondence:**

7 Ulrich Theopold  
8 uli.theopold@su.se

9 **Keywords:** *Drosophila*, Immunity, tumor, endosomal vesicles, glands

10 **Original article, Number of words 4856, Number of figures 6, Number of supplementary**  
11 **figures 5, Number of supplementary tables 2**

12

## 13 **Abstract**

14 Chitinase-like proteins (CLPs) are associated with tissue-remodeling and inflammation but also with  
15 several disorders, including fibrosis, atherosclerosis, allergies, and cancer. However, CLP's role in  
16 tumors is far from clear. Here, we utilize *Drosophila melanogaster* to investigate the function of CLPs  
17 (imaginal disc growth factors; Idgf's) in *Ras*<sup>V12</sup> dysplastic salivary glands. We find one of the Idgf's  
18 members, *Idgf3*, is transcriptionally induced in a JNK-dependent manner via a positive feedback loop  
19 mediated by reactive oxygen species (ROS). Moreover, *Idgf3* accumulates in enlarged endosomal  
20 vesicles (EnVs) that promote tumor progression by disrupting cytoskeletal organization. The process  
21 is mediated via the downstream component,  $\alpha$ Spectrin, which localizes to the EnVs. Our data provide  
22 new insight into CLP function in tumors and identifies specific targets for tumor control.

## 23 **1 Introduction**

24 Chitinase-like protein (CLPs), including human YKL-39 and YKL-40 are synthesized and secreted  
25 under various conditions, including tissue injury, inflammatory and regenerative responses. Under  
26 pathological conditions they may contribute to asthma, sepsis, fibrosis and tumor progression (Roslind  
27 and Johansen 2009, Shao, Hamel et al. 2009) including ductal tumors, such as the lung, breast, and  
28 pancreas (Johansen, Jensen et al. 2006, Uhlen, Zhang et al. 2017). CLPs are regulated by growth  
29 factors, cytokines, stress and the extracellular matrix (ECM). However, the causal connection between  
30 CLPs' function and disease progression is only partially elucidated (Park, Yun et al. 2020).

31 Animal models have been increasingly used in molecular oncology. This includes the fruitfly  
32 *Drosophila melanogaster*, where overexpression of dominant-active Ras (*Ras*<sup>V12</sup>) in proliferating  
33 tissue leads to benign tumors and simultaneous reduction of cell polarity genes to progression towards  
34 an invasive stage. (Brumby and Richardson 2003, Pagliarini and Xu 2003, Igaki, Pagliarini et al. 2006,  
35 Perez, Lindblad et al. 2017). Central to this switch towards increasing malignancy is the C-Jun N-  
36 terminal kinase (JNK)-signaling pathway, which becomes activated via loss of cell polarity and  
37 promotes tumor growth (Zhu, Xin et al. 2010). However, the outcome of activated JNK is mediated in  
38 a context-dependent manner due to downstream effects several of which are yet to be elucidated

39 (Ciapponi, Jackson et al. 2001, Zeke, Misheva et al. 2016). Among potential JNK regulators, spectrin  
40 family members belong to cytoskeletal proteins which form a spectrin-based membrane skeleton  
41 (SBMS) (Bennett and Baines 2001). Through the Rac family of small GTPases, cell polarity and SBMS  
42 organization are maintained (Lee and Thomas 2011, Fletcher, Elbediwy et al. 2015). Although the  
43 exact relationship between Spectrin and JNK in tumors remains to be established, Rac1 under  
44 physiological conditions cooperates with JNK in tissue growth (Baek, Kwon et al. 2010, Wertheimer,  
45 Gutierrez-Uzquiza et al. 2012, Archibald, Mihai et al. 2015).

46 To explore CLPs' tissue autonomous function in a ductal tumor, we utilize the *Drosophila*  
47 *melanogaster* salivary glands (SGs). Generally, *Drosophila* CLPs are endogenously expressed in the  
48 larvae and include six members, termed Idgf 1-6 (Imaginal disc growth factors), that are involved in  
49 development, establishment of the cuticle, wound healing and restoration of cell organization  
50 (Kirkpatrick, Matico et al. 1995, Kawamura, Shibata et al. 1999, Kucerova, Kubrak et al. 2016, Pesch,  
51 Riedel et al. 2016, Yadav and Eleftherianos 2018). The SGs' epithelial luminal organization and the  
52 conserved activation of the tumor-promoting signaling factors make them suitable for dissecting CLP  
53 function. Moreover, the lumen separating a single layer of cells can be disrupted by constitutive active  
54 *Drosophila Ras* (*Ras<sup>V12</sup>*) (Krautz, Khalili et al. 2020) leading to the loss of ECM integrity, the formation  
55 of fibrotic lesions and of the loss of secretory activity (Khalili, Kalcher et al. 2021).

56 Here we investigated the role of *Drosophila* Idgf's in *Ras<sup>V12</sup>*-expressing SGs. We show that one of the  
57 CLP's members, *Idgf3*, is induced in tumor glands, leading to a partial loss of epithelial polarity and  
58 promoting a reduction of lumen size. The mechanism is driven through JNK signaling upstream of  
59 *Idgf3*. In line with previous work, ROS production via JNK mediates induction of *Idgf3*, creating a  
60 tumor-promoting signaling loop. *Idgf3* further promotes the formation of enlarged endosomal vesicles  
61 (EnVs) via  $\alpha$ Spectrin. Inhibiting EnVs formation by individually knocking-down *Idgf3* and  *$\alpha$ Spectrin*,  
62 restores cell organization. Similar effects are observed upon expression of human CLP members in  
63 *Ras<sup>V12</sup>* SGs. Thus, our work identifies a phylogenetically conserved contribution of tumor-induced  
64 CLP's towards the dysplasia of ductal organs and supports a role for spectrins as tumor modifiers.

## 65 **2 Materials and Methods**

### 66 **2.1 *Drosophila* maintenance and larvae staining**

67 Stocks were reared on standard potato meal supplemented with propionic acid and nipagin in a 25°C  
68 room with a 12 h light/dark cycle. Female virgins were collected for five days and crossed to the  
69 respective males (see supplementary cross-list) after two days. Eggs were collected for six hours and  
70 further incubated for 18 h at 29°C. 24 h after egg deposition (AED), larvae were transferred to a vial  
71 containing 3 mL food supplemented with antibiotics (see Table S1). 96 h and 120 h after egg deposition  
72 (AED), larvae were washed out with tap water before being dissected.

### 73 **2.2 Sample preparation and immunohistochemistry**

74 SGs were dissected in 1 x phosphate-buffered saline (PBS) and fixed in 4% paraformaldehyde (PFA)  
75 for 20 min. For extracellular protein staining, the samples were washed three times for 10 min in PBS  
76 and with PBST (1% TritonX-100) for intracellular proteins. Subsequently, samples stained for H2 were  
77 blocked with 0.1% bovine serum albumin (BSA) in PBS, and SG stained for pJNK, *Idgf3*, Spectrin,  
78 Dlg, p62 (ref(2)P), and GFP were blocked with 5% BSA for 20 min. After that, samples were incubated  
79 with the respective primary antibodies. Anti-pJNK (1:250), anti-*Idgf3* (0.0134  $\mu$ g/ml), anti-Spectrin  
80 (0.135  $\mu$ g/ml) diluted in PBST were incubated overnight 4°C. anti-GFP (1  $\mu$ g/ml) in PBST, H2 (1:5),  
81 and anti-SPARC (1:3000) in PBS were incubated for one hour at room temperature (RT). Samples

82 were washed three times with PBS or PBST for 10 min and incubated with secondary antibody anti-  
83 mouse (4 µg/ml, Thermofisher #A11030) or anti-rabbit (4 µg/ml, Thermofisher #A21069) for one hour  
84 at RT. Subsequently, samples were washed three times in PBS or PBST for 10 min and mounted in  
85 FluoromountG.

### 86 **2.3 Salivary gland size imaging and analysis**

87 SG samples were imaged with Axioscope II (Objective 4x) (Zeiss, Germany) using AxioVision LE  
88 (Version 4.8.2.0). The images were exported as TIF and analyzed in FIJI (ImageJ: Version 1.53j).  
89 Representative confocal pictures were selected for figure panels and the complete set of replicate  
90 figures processed further for quantification (see below). Region of Interest (ROI) were drawn with the  
91 Polygon selection tool, and the scale was set to pixels (Px). The SG area was summarized as a boxplot  
92 with whisker length min to max. The bar represents the median. Statistical analysis was done with  
93 Prism software (GraphPad Software, 9.1.2, USA), the population was analyzed for normality with  
94 D'Agostino-Pearson and p-value quantified with Student's t-test.

### 95 **2.4 Nuclear volume imaging and quantification**

96 Nuclei were stained with DAPI (1 µg/ml, Sigma-Aldrich D9542) in PBST for 1 h at RT. Mounted  
97 glands were imaged with Zeiss LSM780 (Zeiss, Germany) using a plan-apochromat 10x/0.45 objective  
98 with a pixel dwell 3.15 µs and 27 µm pinhole in z-stack and tile scan mode. Zeiss images were imported  
99 into ImageJ and viewed in Hyperstack. The selection threshold was set individually for each sample,  
100 and the analysis was performed with 3D objects counter. The nuclei volume was presented in boxplot,  
101 whisker length min to max and bar represent median. P-value quantified with Student's t-test and the  
102 scale bar represent µm<sup>3</sup>.

### 103 **2.5 Intensity and hemocyte quantification**

104 The images for quantifying pJNK, TRE, Idgf3, and SPARC intensity and hemocyte recruitment were  
105 captured with AxioscopeII (Objective 4x) (Zeiss, Germany). The images were exported as TIF and  
106 analyzed in ImageJ. ROI was drawn with the Polygon selection tool, and subsequently, the total  
107 intensity was measured (pixel scale). The intensity was quantified according to the equation: Integrated  
108 Density – (SG area\*Mean gray value). Hemocyte area was selected with Threshold Color and  
109 quantified by using the following equation: Ln (Hemocyte area + 1)/Ln (SG size + 1). Representative  
110 images were taken with Zeiss LSM780 (Zeiss, Germany). The images were then processed using  
111 Affinity Designer (Serif, United Kingdom). Graphs and statistical analysis were generated with Prism  
112 software (GraphPad Software, 9.1.2, USA). The population was analyzed for normality with  
113 D'Agostino-Pearson. Statistical significance was determined with Student's t-test, One-way ANOVA  
114 with Tukey's multiple comparison, and two-way ANOVA with Dunnett's multiple comparison.

### 115 **2.6 Enlarged endosomal vesicles penetrance quantification**

116 The penetrance of the enlarged vesicles was subjectively quantified. Samples were analyzed in  
117 Axioscope II (Objective 20x) (Zeiss, Germany). At least 15 samples were analyzed with three  
118 independent replicas.

### 119 **2.7 Humanized transgenic *Drosophila* lines**

120 Plasmids were generated and transformed at VectorBuilder (<https://en.vectorbuilder.com/>). Human  
121 *CH3L1* and *CH3L2* genes were inserted into *Drosophila Gene Expression Vector pUASTattB* vector  
122 generating VB200527-1248haw and VB200518-1121xyy, respectively and transformed into *E. coli*.

123 The bacteria were cultured in 3 ml LB supplemented with ampicillin (AMP: 100 ug/ml) for 15 h, at  
124 37°C. The plasmid was extracted according to the GeneJet™ Plasmid Miniprep Kit #K0503 standard  
125 procedure. Plasmids were validated through sequencing at Eurofins (<https://www.eurofins.se/>: For  
126 primer details see Table S1). *Drosophila* transgenic lines were generated at thebestgene  
127 (<https://www.thebestgene.com/>). Plasmids were extracted with QIAGEN Plasmid Maxi Kit according  
128 to the standard procedure and injected into *w<sup>1118</sup>* strains. Expression of the human CLPs was validated  
129 with qPCR.

## 130 **2.8 *In situ* hybridization**

131 The *Idgf3* (GH07453: DGRC) probe was generated according to (Hauptmann., 2015). The staining  
132 procedure is described elsewhere with the following changes (Hauptmann et al., 2016). The procedure  
133 was conducted in 200 µl transwells containing four salivary glands. The procedure included three  
134 technical replicas per genotype. Images were acquired with Leica MZI16 (Leica, Germany) microscope  
135 and Leica DFC300x FX digital colour camera (Leica, Germany). Representative images were taken,  
136 and figures were generated in Affinity Designer (Serif, United Kingdom).

## 137 **2.9 qPCR**

138 mRNA isolation and cDNA synthesis were performed according to manufacturer instructions  
139 (AM1931). qPCR procedures were performed as described earlier (Krautz et al., 2021) with an adjusted  
140 Kappa concentration to 0.5x. At least three replicates and two technical replicates were performed for  
141 each qPCR. See supplementary Table S1 for primer list.

## 142 **3 Results**

### 143 **3.1 *Idgf3* promotes a dysplastic phenotype**

144 Obstruction of SG lumen by the constitutive-active oncogene, *Ras<sup>V12</sup>*, under *Beadex-Gal4* driver  
145 (*Ras<sup>V12</sup>*) disrupts organ function between 96 h and 120 h after egg deposition (AED) (Khalili, Kalcher  
146 et al. 2021). Being that CLPs have been implicated in the loss of cell polarity (Morera, Steinhäuser et  
147 al. 2019), we investigated whether *Drosophila* CLPs contribute to the observed phenotype. First, to  
148 find out whether CLPs were induced in the *Ras<sup>V12</sup>* glands, we assessed relative mRNA levels at two  
149 different time points, 96 h and 120 h AED. Only one of the *CLP* members, namely *Idgf3*, was  
150 significantly upregulated at both time points (Fig. 1A and Fig. S1A). Therefore, we decided to focus  
151 on *Idgf3*'s effects on dysplastic glands.

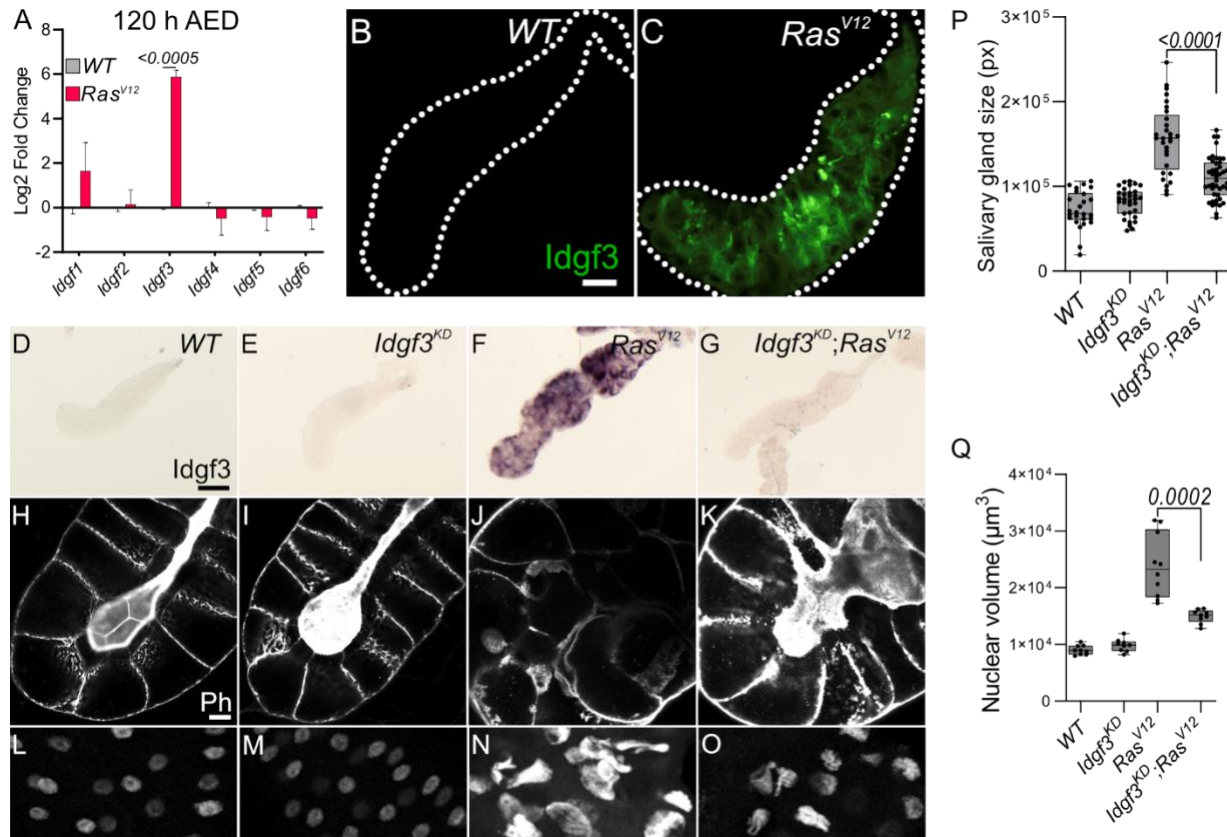

**Figure 1**

**Idgf3 promotes growth and disrupts tissue architecture**

(A) qPCR data showing induction of *Idgf3* in 120 h AED *Ras<sup>V12</sup>* glands. (B-C) *Idgf3* tagged with GFP was localized in the dysplastic glands. (D-G) Knock-down of *Idgf3* in *Ras<sup>V12</sup>* glands confirmed reduced mRNA levels as shown by in situ hybridization. (H-K) F-actin (Phalloidin) staining revealed partial restoration of the lumen in *Idgf3<sup>KD</sup>;Ras<sup>V12</sup>* glands, in comparison to *Ras<sup>V12</sup>* alone. (P) SG size quantification showing a reduction in tissue size in *Idgf3<sup>KD</sup>;Ras<sup>V12</sup>* SG compared to *Ras<sup>V12</sup>* alone. (L-O) Nuclei in DAPI stained SG displayed a reduced size in *Idgf3<sup>KD</sup>;Ras<sup>V12</sup>*; quantified in (Q). Scale bars in (B-C) represent 100  $\mu\text{m}$ , (D-G) represent 0.3 mm and (H-K) represent 20  $\mu\text{m}$ . Data in (A) represent 3 independent replicas summarized as mean  $\pm$  SD. Boxplot in (P, Q) represent at least 20 SG pairs. Whisker length min to max, bar represent median. P-value quantified with Student's t-test.

*Idgf3* contains an N-terminal signal peptide and has been detected in hemolymph (Karlsson, Korayem et al. 2004). To analyze its subcellular tissue distribution in SGs, we used a C-terminally GFP tagged version of *Idgf3* (Kucerova, Kubrak et al. 2016). At 96 h we could not detect *Idgf3* in the whole WT or *Ras<sup>V12</sup>* animals (Fig. S1F-G'), possibly due to limited sensitivity. Likewise, 120 h old WT larvae did not show any detectable signal (Fig. S1H-H') while a strong *Idgf3* signal was detected in *Ras<sup>V12</sup>* SGs (Fig. S1I-I'). To better understand *Idgf3* distribution at a higher resolution, we dissected 120 h AED glands. WT glands had a weaker *Idgf3::GFP* signal in comparison to the *Ras<sup>V12</sup>* (Fig. 1B-C). Moreover, *Idgf3* was unevenly distributed throughout *Ras<sup>V12</sup>* SGs (Fig. 1C).

The increased level of *Idgf3* between 96 h and 120 h strongly correlated with loss of tissue- and cell- organization and an increased nuclear volume (Krautz, Khalili et al. 2020). In order to characterize the role of *Idgf3* in *Ras<sup>V12</sup>* glands, we used a specific *Idgf3* RNA-interference line (*Idgf<sup>KD</sup>*). Moreover, we

175 focused on 120 h larvae, unless otherwise stated, since they showed the most robust and developed  
176 dysplastic phenotype. Efficient knockdown of *Idgf3* was confirmed using ISH and at the protein level  
177 (Fig. 1D-G, S1J-M; quantified in N, (Kucerova, Kubrak et al. 2016)). Macroscopic inspection showed  
178 that *Idgf<sup>KD</sup>;Ras<sup>V12</sup>* SGs were smaller than *Ras<sup>V12</sup>* SGs (Fig. 1P), resembling WT controls. To gain  
179 insight into the cellular organization, we stained the glands for F-actin (Phalloidin: Ph) and DNA using  
180 DAPI. In *Idgf<sup>KD</sup>* the cells retained their cuboidal structure, and the lumen was visible as in *WT*,  
181 indicating that *Idgf3* on its own does not affect apicobasal polarity (Fig. 1H-I). In contrast, in *Ras<sup>V12</sup>*  
182 glands apicobasal polarity was lost, and the lumen was absent (Fig. 1J, (Khalili, Kalcher et al. 2021)).  
183 In *Idgf<sup>KD</sup>;Ras<sup>V12</sup>* SGs a reversal to the normal distribution of F-actin and partial restoration of the lumen  
184 was observed (Fig. 1K). Similarly, the nuclear volume, which increased in *Ras<sup>V12</sup>* SGs returned to near  
185 wild type levels upon *Idgf<sup>KD</sup>* (Fig. 1 L-O, quantified in Q). This indicates that *Idgf<sup>KD</sup>* can rescue *Ras<sup>V12</sup>*-  
186 induced dysplasia.

187 In order to unravel the specific effects mediated by *Idgf3* we further investigated *Ras<sup>V12</sup>* associated  
188 phenotypes, including fibrosis and the cellular immune response. As recently reported, *Ras<sup>V12</sup>* SGs  
189 displayed increased levels of the extracellular matrix components (ECM), including collagen IV and  
190 SPARC (BM40, (Khalili, Kalcher et al. 2021)). *Idgf<sup>KD</sup>* did not affect SPARC levels in comparison to  
191 the *WT* (Fig. S1 O-P) but *Idgf-KD;Ras<sup>V12</sup>* SGs displayed significantly reduced SPARC levels in  
192 comparison to *Ras<sup>V12</sup>* (Fig. S1 Q-R, quantified in S). To assess whether this led to a reduced  
193 inflammatory response, we investigated the recruitment of plasmacytes, macrophage-like cells  
194 previously reported to be recruited towards tumors (Perez, Lindblad et al. 2017). We found that both  
195 control and *Idgf<sup>KD</sup>* glands did not show recruitment of hemocytes (Fig. S1T-U). In contrast to the effects  
196 on ECM components, *Idgf<sup>KD</sup>* in *Ras<sup>V12</sup>* glands did not lead to any changes in hemocyte attachment (Fig.  
197 S1V-W, quantified in X). Taken together, upon *Ras<sup>V12</sup>* overexpression, *Idgf3* promotes SG overgrowth,  
198 loss of cell organization, and fibrotic-like accumulation of the ECM, but not immune cell recruitment.

### 199 **3.2 *Idgf3* induces dysplasia via JNK-signaling**

200 Dysplasia is driven by internal and external factors that either work in concert or independently. Similar  
201 to what we observed in *Idgf<sup>KD</sup>;Ras<sup>V12</sup>* glands blocking the sole *Drosophila* JNK member *basket* reverts  
202 many tumor phenotypes. Moreover, the dysplastic loss of apical and basolateral polarity between 96 h  
203 and 120 h is driven by the JNK-pathway (Krautz, Khalili et al. 2020). The time frame when we  
204 observed upregulation of *Idgf3* (Fig. 1A, S1A) coincides with the period during which blocking JNK  
205 restores tissue organization and homeostasis, similar to what occurs in *Idgf<sup>KD</sup>;Ras<sup>V12</sup>* tissues (Fig. 1K,  
206 S1R). Therefore, we decided to test a possible involvement of JNK-signaling in the regulation of *Idgf3*.

207 First, we performed a targeted JNK RNAi-screen using *Idgf3::GFP* intensity in the glands as readout  
208 upon KD of JNK signaling components. We first confirmed the sensitivity of the *Idgf3::GFP* construct  
209 by *Idgf3-KD* in *Ras<sup>V12</sup>* SGs compared to *Ras<sup>V12</sup>* glands (Fig. S2A-B, quantified in Fig S2C). KD of the  
210 two classical TNF receptors upstream of JNK, *Grnd* (*Grindelwald*) and *Wgn* (*Wengen*) similarly  
211 reduced *Idgf3::GFP* intensity (Fig 2B-C, quantified in I (Palmerini, Monzani et al. 2021)). Similar  
212 effects were observed with *Bsk<sup>KD</sup>* (Fig. 2A, D, quantified in I). Altogether this suggests that *Idgf3*  
213 protein levels are regulated downstream of JNK and the TNF members *Grnd* and *Wgn*.

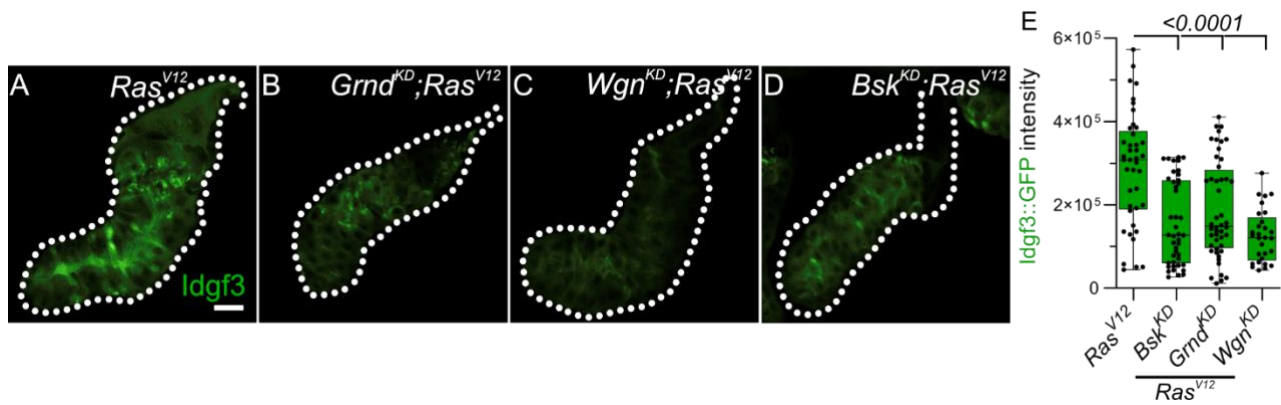

214 **Figure 2**

215 **Idgf3 dysplasia is mediated through JNK activity**

216 (A-D) Representative images of Idgf3::GFP in a JNK targeted screen. (E) Quantification showing  
217 Idgf3::GFP intensity was reduced by *Grnd<sup>KD</sup>*, *Wgn<sup>KD</sup>* and *Bsk<sup>KD</sup>* in *Ras<sup>V12</sup>* SG. Scale bars in (A-D)  
218 represent 100  $\mu$ m. Boxplot in (E) represents at least 20 SG pairs. Whisker length min to max, bar  
219 represent median. P-value quantified with Student's t-test.

220

221 **3.3 ROS promotes Idgf3 induction via JNK**

222 To further dissect Idgf3 regulation, we focused on the positive JNK regulators, reactive oxygen species  
223 (ROS) both intra- and extracellularly (Diwanji and Bergmann 2017, Perez, Lindblad et al. 2017). We  
224 previously reported that ROS production in *Ras<sup>V12</sup>* SGs increases via JNK (Krautz, Khalili et al. 2020).  
225 To inhibit ROS intra- and extracellularly, we separately overexpressed the H<sub>2</sub>O<sub>2</sub> scavengers Catalase  
226 (Cat) and a secreted form of Catalase, IRC (immune-regulated Catalase), and O<sub>2</sub><sup>-</sup> scavenger SOD  
227 (Superoxide dismutase A), in the *Ras<sup>V12</sup>* background and quantified Idgf3::GFP intensity. Reducing  
228 levels of intracellular H<sub>2</sub>O<sub>2</sub> (*Cat<sup>OE</sup>*), but not O<sub>2</sub><sup>-</sup> (*SOD<sup>OE</sup>*) lowered Idgf3::GFP intensity (Fig. S3A-D  
229 quantified in E). Similarly, reduction of extracellular H<sub>2</sub>O<sub>2</sub> by the secreted version of Catalase lowered  
230 Idgf3::GFP levels (Fig. 2B-E, quantified in A) as well as JNK signaling. In line with the reduced tissue  
231 size and improved tissue integrity in *Idgf3<sup>KD</sup>*; *Ras<sup>V12</sup>*, overexpression of *IRC* in *Ras<sup>V12</sup>* SGs also reduced  
232 SG size (Fig. 3U), improved tissue integrity and restored the SG lumen (Fig. 3F-I, P-S).

233 In summary, ROSs contribute to pJNK signaling. In addition, overexpression of extracellular and  
234 intracellular Catalase but not SOD reduces Idgf3 induction via JNK, similar to the feedback loop that  
235 has been identified in other tumor models (Perez, Lindblad et al. 2017).

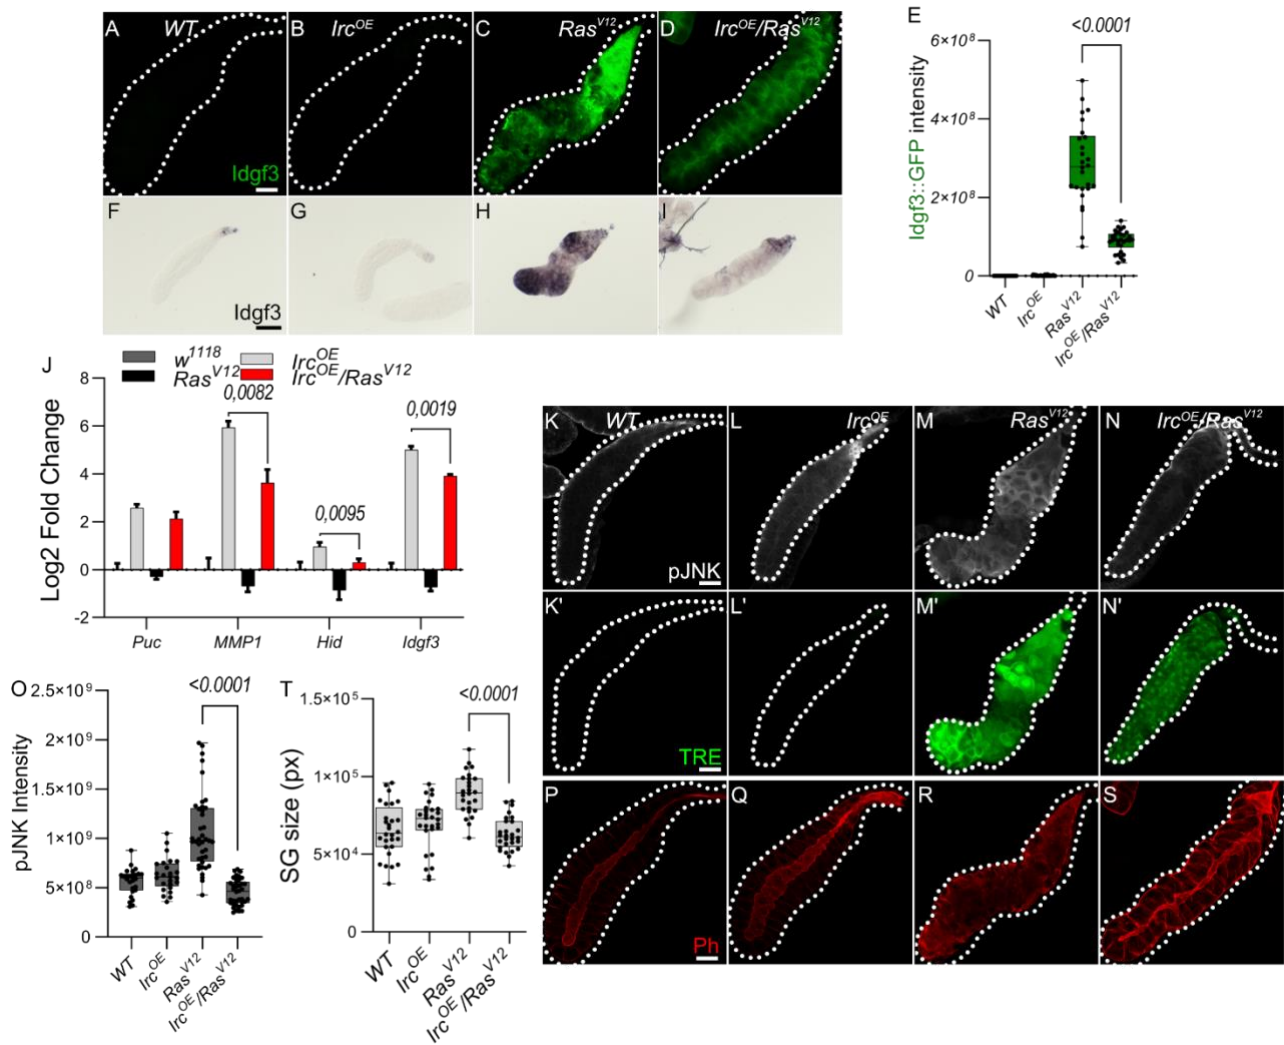

**Figure 3**

**Idgf3 regulation feeds into a JNK-ROS feedback loop**

(A-D) Reduction of H<sub>2</sub>O<sub>2</sub> by overexpression of secreted catalase (immune regulated catalase; IRC) lowered Idgf3::GFP levels, quantified in (E). (F-I) ISH showing reduced expression of *Idgf3* in *IRC<sup>OE</sup>;Ras<sup>V12</sup>* glands. (J) qPCR data showing reduction of *Idgf3*, *MMP1* and *Hid* in *IRC<sup>OE</sup>;Ras<sup>V12</sup>* glands.

(K-N') pJNK staining and TRE reporter constructs showing reduced intensity in *IRC<sup>OE</sup>;Ras<sup>V12</sup>* in comparison to *Ras<sup>V12</sup>* glands, quantified in (O). (P-S) Phalloidin staining showing partially restored lumen in *IRC<sup>OE</sup>;Ras<sup>V12</sup>* glands, quantified in (T). Scale bars in (A-D, K-S) represent 100 μm and (F-I) represent 0.3 mm. Data in (J) represent 3 independent replicas summarized as mean ± SD. Boxplot in (E, O, T) represent at least 20 SG pairs. Whisker length min to max, bar represent median. P-value quantified with Student's t-test.

**3.4 Idgf3 accumulates in large vesicles, which display markers for endocytosis and macropinocytosis**

We previously noted the uneven distribution of Idgf3 in *Ras<sup>V12</sup>* SGs (Fig. 1C). To further understand how Idgf3 promotes dysplasia, we dissected its subcellular localization (Fig. 4A). We stained the glands for F-actin (Phalloidin) and addressed Idgf3::GFP localization at high resolution (Fig. 4B-C'). Interestingly, we observed Idgf3::GFP clusters surrounded by F-actin (Fig. 4C-C': arrow). Using a different salivary gland driver (*AB-Gal4*) to drive expression of *Ras<sup>V12</sup>*, we also observed increased



254 expression of *Idgf3::GFP* and its localization within vesicular structures (Fig. S4V-W': arrow). The  
 255 size of the vesicle-like structures was between 10-43  $\mu\text{m}$  in comparison to secretory *Drosophila*  
 256 vesicles (3-8 $\mu\text{m}$ , Fig. 4D) (Tran and Hagen., 2017). We refer to these as enlarged vesicles (EnVs).  
 257 Based on the increased *Idgf3* levels, we wondered whether the protein was aggregating in EnVs. Unlike  
 258 in *WT* glands, the aggregation marker, p62 (*Drosophila Ref(2)P*, (Bartlett, Isakson et al. 2011) strongly  
 259 bound to the cytoplasm of *Ras*<sup>V12</sup> *SGs*. However, the EnVs did not contain any aggregated proteins  
 260 (Fig. S4X-Y').

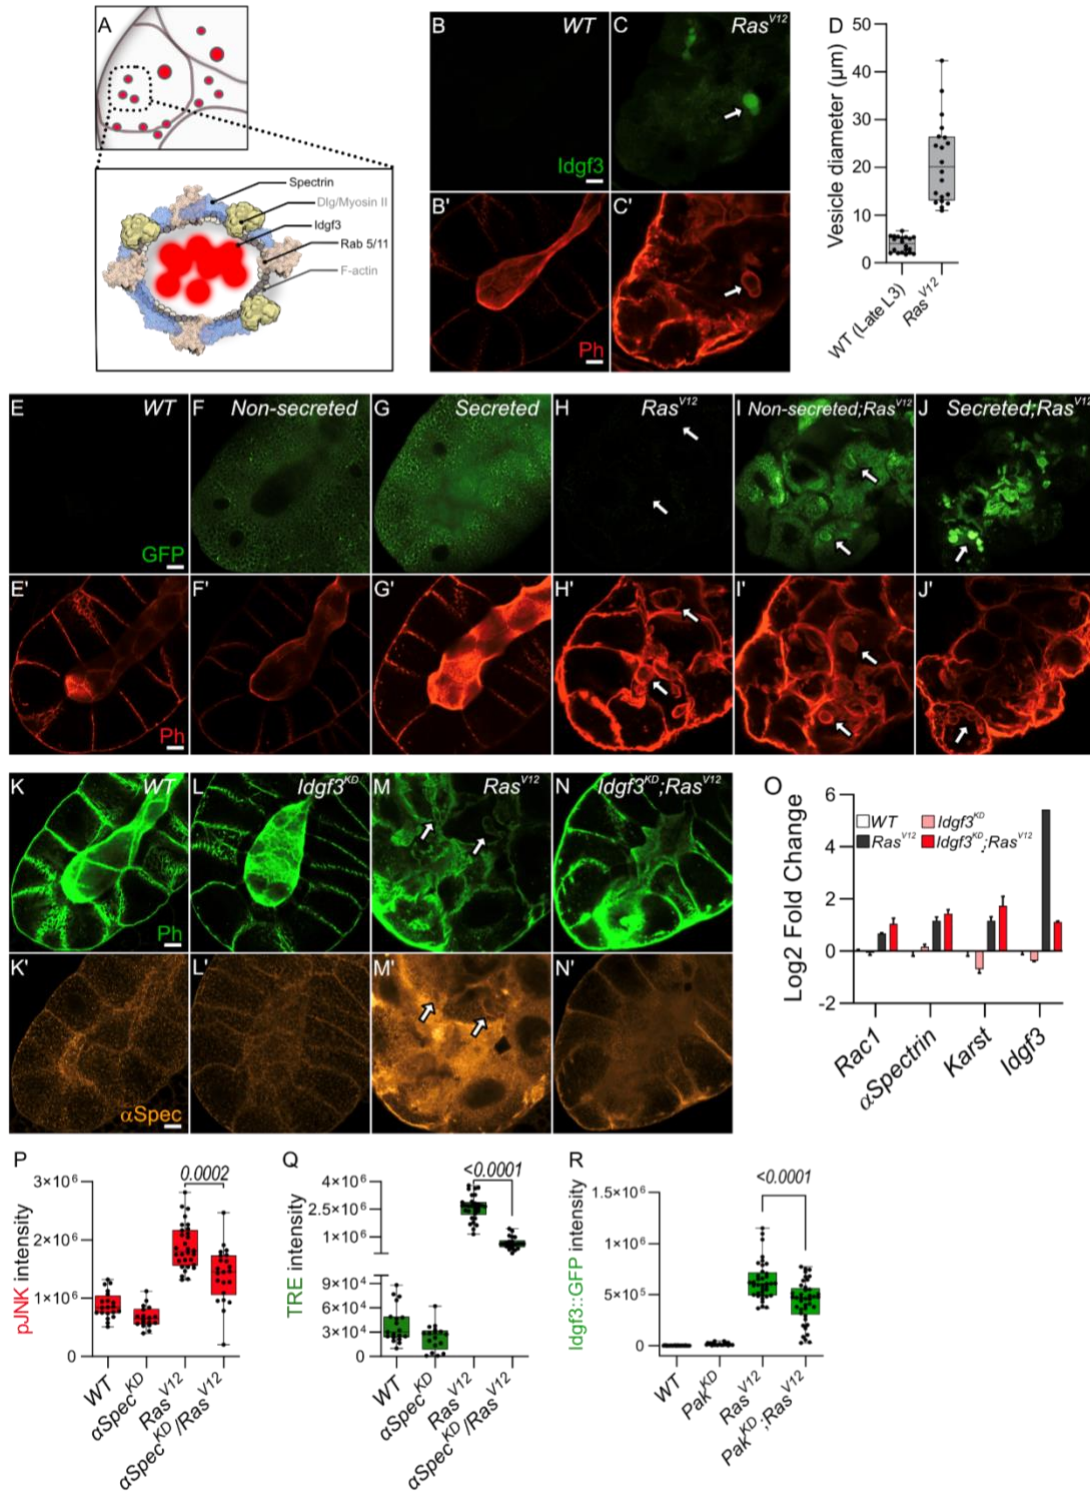

## Figure 4

### *Idgf3* promotes formation of enlarged endosomes

(A) *Idgf3* enclosed by enlarged vesicles (EnVs) coated by cytoskeletal and cell polarity proteins. (B-C') *Idgf3::GFP* clusters coated with Phalloidin. (D) Vesicle size quantification showing *Ras*<sup>V12</sup> enlarged vesicles in comparison to prepupae SG vesicles. (E-J') Non secreted MFGGE8 localizes to the surface of EnVs, co-stained with phalloidin. The secreted MFGGE8 is packaged into EnVs in *Ras*<sup>V12</sup> glands. Scale bars in (B-C', E-J') represent 20  $\mu$ m. Boxplot in (D) represents 20 EnVs. Whisker length min to max, bar represent median. P-value quantified with Student's t-test.

To further understand whether the localization of *Idgf3* in EnVs was dependent on the presence of a secretion signal we overexpressed two versions of human phosphatidylserine binding protein, MFG-E8 (Milk fat globule-EGF factor), without (referred as non-secreted: Fig. 4F-F',I-I') and with a signal peptide (referred as secreted: Fig. 4G-G',J-J', Asano et al., 2004). In controls, the non-secreted form was found in the cytoplasm, whereas the secreted version was detected in the cytoplasm and in the lumen (Fig. 4F-G'). In *Ras*<sup>V12</sup> SGs, the non-secreted form was surrounding the EnVs (arrow), indicating the presence of phosphatidylserine on their membrane (Fig. 4I-I'). In contrast, the secreted form localized to the inside of the EnVs (Fig. 4J-J': arrow). These data suggest that EnVs are surrounded by a lipid membrane and recruit from the SG lumen.

In order to further characterize *Idgf3*-containing EnVs we co-expressed vesicle-specific Rab's coupled with a GFP fluorophore, a lysosomal marker (Atg8), an autophagy marker (Vps35), and a marker for phosphatidylinositol-3-phosphate-(PtdIns3P: *FYVE*)-positive endosomes in *Ras*<sup>V12</sup> glands (For a complete set, see Fig. S4A-I''). To increase sensitivity and to identify EnVs, we stained with anti-GFP and co-stained with Phalloidin. Localization of Rabs and phalloidin to the same vesicles was observed with Rab5 and Rab11 but not Rab7 (Fig. S4A-D'', S4I-I''). Moreover, EnVs were also positive for PtdIns3 (Fig. S4H-H''). In line with their dependence on secretion, this potentially identifies EnVs as enlarged recycling endosomes. EnV accumulation in *Ras*<sup>V12</sup> glands between 96 h and 120 h implies that (i) endosome formation is either increased compared to *WT* or (ii) that endosomes are not normally recycled leading to their accumulation. The latter hypothesis correlates with the loss of apico-basolateral polarity and the disruption of secretion due to a lack of a luminal structure (Khalili, Kalcher et al. 2021). To test the first hypothesis, we blocked the formation of early endosomes with *Rab5*<sup>DN</sup>. Apico-basolateral polarity, detected by a visible lumen, was not affected by *Rab5*<sup>DN</sup>. Moreover, *Rab5*<sup>DN</sup>; *Ras*<sup>V12</sup> did not block EnV formation and restoration of apicobasal polarity (Fig. S4J-M). Halting the recycling endosome pathway via *Rab11*<sup>DN</sup> increases the endosomes' accumulation without affecting cell polarity (Fig. S4N). In contrast, in *Rab11*<sup>DN</sup>; *Ras*<sup>V12</sup> SGs, endosomes were not accumulating, and EnVs were still detected (Fig. S4O). Taken together, EnV formation is independent of the classical recycling pathway, suggesting other candidates are involved in their generation.

In SGs, overexpression of Rac generates enlarged vesicles with similarity to the EnVs described here (Lee and Thomas 2011). Supporting a role in dysplasia in our system, *Ras*<sup>V12</sup> SGs showed stronger Rac1 expression in comparison to the control. Moreover, we observed Rac1 also localized to EnVs (Fig. S4P-Q'). Decoration with Rac1 and actin as well as their dependence on Ras activation potentially identifies EnVs as macropinocytotic vesicles ((Recouvreux and Comisso 2017), see also discussion). The enlarged vesicles that form upon Rac overexpression in SGs (Lee and Thomas 2011) also stain positive for Spectrins identifying them as additional candidates for EnVs formation. Of note, Spectrins under physiological settings are involved in the maintenance of cellular integrity including epithelial organization, which is lost in *Ras*<sup>V12</sup> SGs.

### 306 **3.5 JNK promotes EnVs formation via *Idgf3* upstream of $\alpha$ Spectrin**

307 To analyze Spectrin contribution to EnVs formation, we stained for  $\alpha$ Spectrin, one of the three  
308 members in flies (Williams, Smith et al. 2003) and found it to be induced in *Ras*<sup>V12</sup> SGs and to localize  
309 to the EnVs (Fig. S5A-B’). Knockdown of *Idgf3* in *Ras*<sup>V12</sup> SGs reduced both  $\alpha$ Spectrin levels and  
310 EnVs formation (Fig 5A-D’). Despite efficient *Idgf3*<sup>KD</sup>, transcript levels for both  $\alpha$ - and  $\beta$ <sub>Heavy</sub>Spectrin  
311 as well as for Rac1 were not affected indicating regulation at the posttranscriptional level (Fig. 5E).  
312 Moreover, we found markers for cell polarity including Dlg, and Myosin II also decorate the EnVs  
313 (Fig. S4R—U’: arrow). In contrast,  $\alpha$ Spectrin<sup>KD</sup> (Fig. S5C-F quantified G) reduced *Idgf3* levels (Fig.  
314 5F-I’ quantified J) as well as JNK signaling upstream of *Idgf3* (Fig 5U-V). Further supporting a role  
315 for Spectrins in SG dysplasia, k/d of  $\alpha$ Spectrin in *Ras*<sup>V12</sup> glands abolished EnVs formation and partially  
316 restored the SG lumen (Fig. 5I’’).

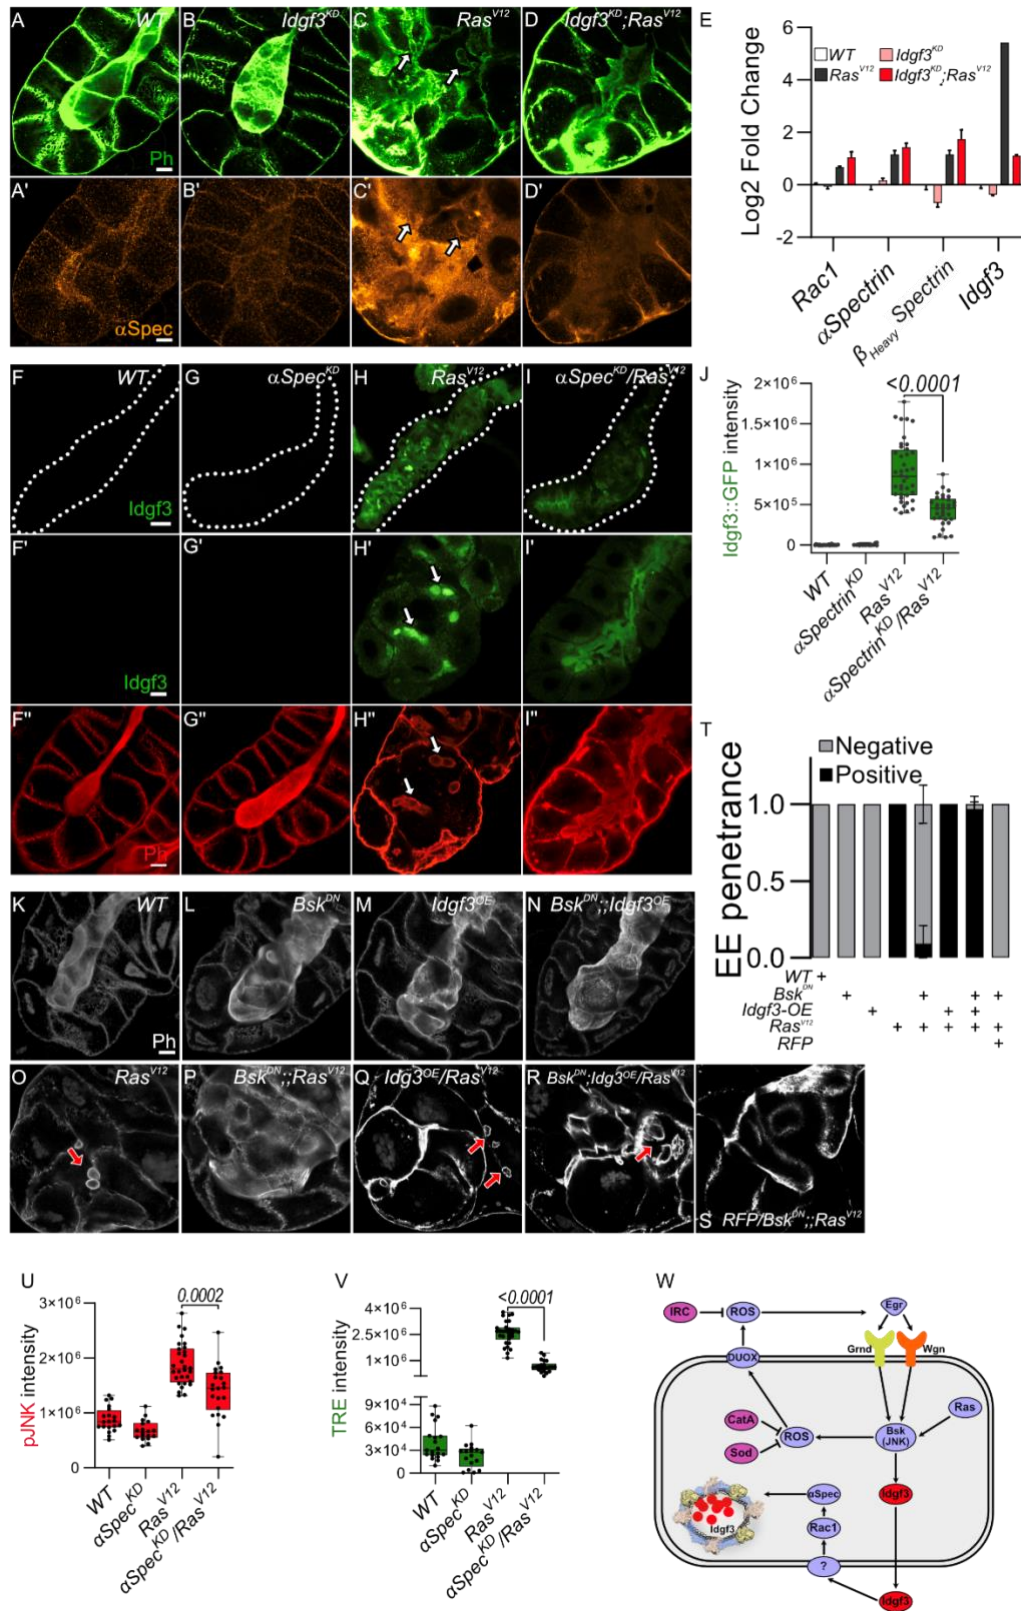

317  
 318  
 319  
 320

321 levels of  $\alpha$ Spectrin ( $\alpha$ Spectrin<sup>KD</sup>/*Ras*<sup>V12</sup>) reduces Idgf3::GFP levels quantified in (J), prevents  
322 formation of EnVs and largely restores the SG lumen (arrows indicate EnVs). (K-S) Phalloidin  
323 staining showing epistasis of EnVs formation in which Idgf3 acts downstream of JNK. (T) EnVs  
324 penetrance quantification showing a strong induction of EnVs in *JNK*<sup>DN</sup>;;*Idgf3*<sup>OE</sup>/*Ras*<sup>V12</sup> glands. (U)  
325 pJNK intensity quantification showing reduced levels in *aSpectrin*<sup>KD</sup>/*Ras*<sup>V12</sup>. (V) TRE intensity  
326 quantification showing reduced levels in *aSpectrin*<sup>KD</sup>/*Ras*<sup>V12</sup>. (W) Idgf3 promotes formation of  
327 EnVs, upstream of Rac1. Scale bars in (A-D', F'-I'', K-S') represent 20  $\mu$ m, (F-I) represents 100  
328  $\mu$ m. Data in (E) represent 3 independent replicas summarized as mean  $\pm$  SD. Barplots in (T)  
329 represent 3 independent replicas with at least 10 SG pairs, summarized as mean  $\pm$  SD. Boxplots in (J,  
330 U-V) represent at least 20 SG pairs. Whisker length min to max, bar represent median. P-value  
331 quantified with Student's t-test.  
332

333 Taken together this suggests that Idgf3 promotes EnVs formation (Fig. 5C-D) most likely post-  
334 transcriptionally (Fig. 5E). In line, overexpression of Idgf3 throughout the whole gland, at 96 h, as  
335 shown by ISH (Fig. S5I-L), led to an increase in the number of glands with endosomes (Fig. S5M-P''',  
336 quantified in Q). To address epistasis between Idgf3 and JNK we calculated the penetrance of EnVs  
337 formation. In *Ras*<sup>V12</sup> SGs we observed EnVs in 100 % of the glands, an effect that was strongly blocked  
338 in *Bsk*<sup>DN</sup>;;*Ras*<sup>V12</sup> (Fig. 5O-P, quantified in T). Blocking JNK and overexpressing *Idgf3* in *Ras*<sup>V12</sup>  
339 strongly reverted the *Bsk*<sup>DN</sup>;;*Ras*<sup>V12</sup> phenotype, a lumen could not be detected, and around 98% of the  
340 glands contained enlarged endosomes (Fig. 5O,R, quantified in T) while control SGs using RFP-  
341 overexpression retained the *Bsk*<sup>DN</sup>;;*Ras*<sup>V12</sup> phenotype. Overexpression of Idgf3 alone did not result in  
342 EnVs formation (Fig. 5K-N). In conclusion, the data suggest that Idgf3 acts downstream of JNK and -  
343 through formation of EnV's - disrupts luminal integrity.

### 344 3.6 Human CLP members enhance dysplasia in *Drosophila* SGs

345 Finally, we wished to determine whether the tumor-modulating effects we had observed for *Drosophila*  
346 Idgf3 also applies to human CLP members. For this we expressed two human CLPs (*Ch3L1* or *Ykl-40*;  
347 29% AA identity to Idgf3 and *Ch3L2* or *Ykl-39*; 26% AA identity, Fig. 6A) in SGs, both on their own  
348 and in combination with *Ras*<sup>V12</sup>. Similar to Idgf3, both CLPs enhanced the hypertrophy observed in  
349 *Ras*<sup>V12</sup> SGs (Fig. 6B-G quantified in N). Additionally, *Ch3L1* enhanced the prevalence of EnVs in the  
350 Ras mutant background (Fig. 6O). Taken together this means that the tumor-promoting effect of CLPs  
351 is conserved between *Drosophila* and humans and may affect different phenotypes of dysplasia  
352 depending on the CLP under study.

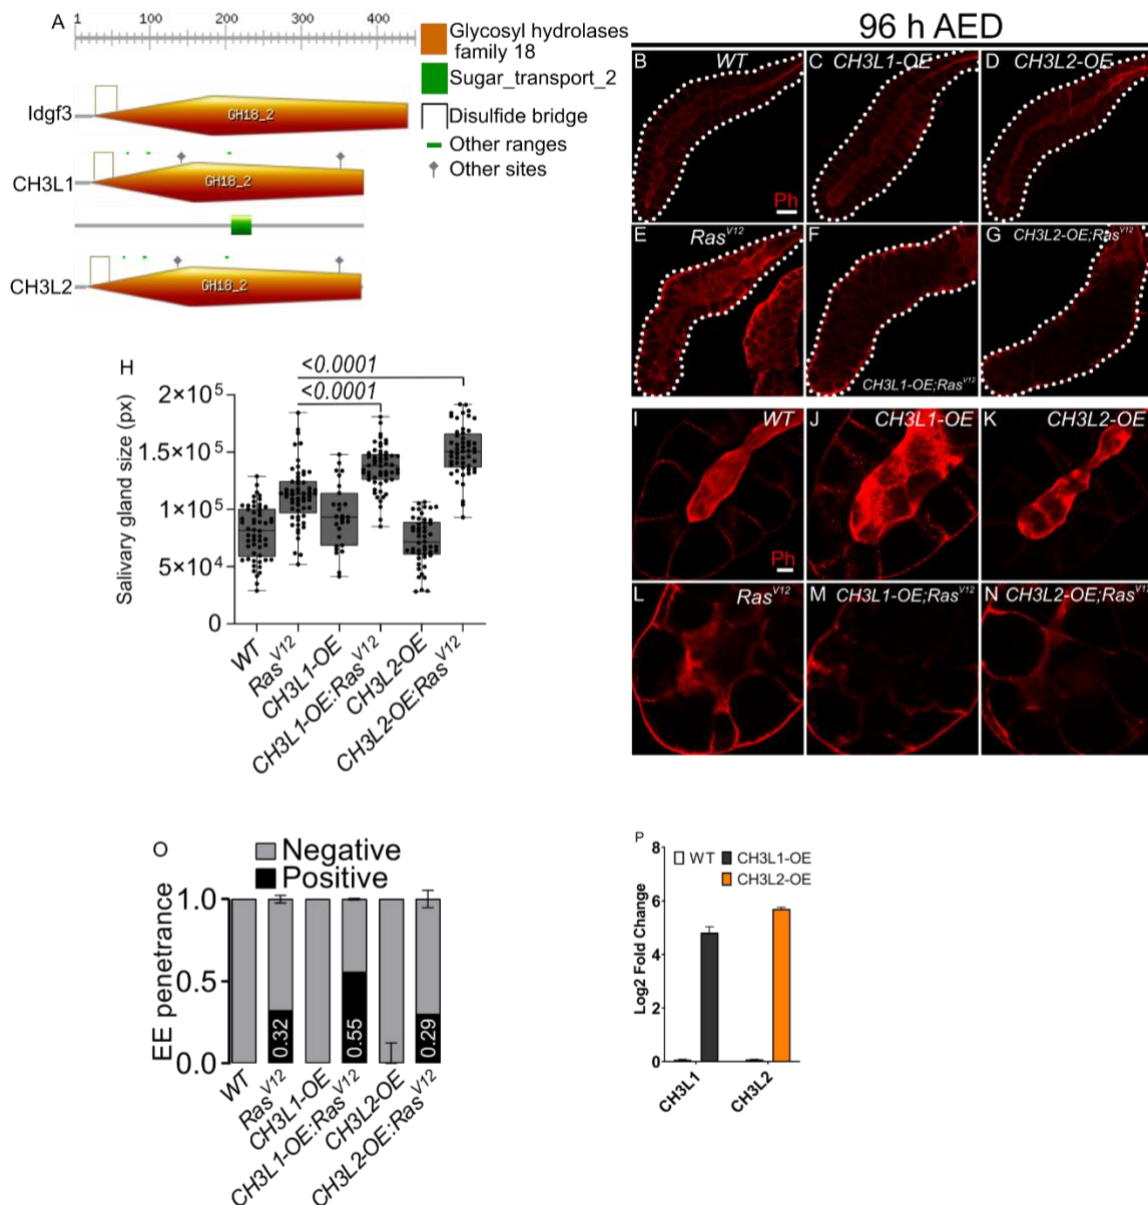

**Figure 6**

**Human Chitinase-like proteins similarly to Idg3 promotes EnVs formation**

(A) Comparison of Idgf3, CH3L1 and CH3L2 protein motifs (<https://prosite.expasy.org>). (B-G) Representative images of phalloidin staining used for size quantification. (H) SG size quantification showing an increase in tissue size in *CH3L1<sup>OE</sup>;Ras<sup>V12</sup>* and *CH3L2<sup>OE</sup>;Ras<sup>V12</sup>* SG compared to *Ras<sup>V12</sup>* alone. (I-N) Phalloidin staining depicting disrupted lumen integrity in *Ras<sup>V12</sup>* glands. (O) EnVs penetrance quantification showing an induction of EnVs in *CH3L1<sup>OE</sup>;Ras<sup>V12</sup>* glands. (P) qPCR confirmation of CH3L1 and CH3L2 expression in SG. Scale bars in (B-G) represent 100  $\mu$ m and (I-N) 20  $\mu$ m. Boxplot in (H) represent at least 20 SG pairs. Whisker length min to max, bar represent median. P-value quantified with Student's t-test. Barplots in (O) represent 3 independent replicas with at least 10 SG pairs, summarized as mean  $\pm$  SD. Barplots in (P) represent 4 independent replicas with at least 10 SG pairs, summarized as mean  $\pm$  SD.

## 366 4 Discussion

367 The levels of Chitinase-like proteins (CLPs) are elevated during a wide range of inflammatory  
368 processes as well as neoplastic disorders. Their physiological function has been more elusive but  
369 includes the formation of extracellular assemblages (Zhao, Su et al. 2020) including the insect cuticle  
370 (Pesch, Riedel et al. 2016), wound healing and in both mammals (Zhao, Su et al. 2020) and insects  
371 (Kucerova, Broz et al. 2015) and the restoration of cell integrity after oxidative damage (Lee, Da Silva  
372 et al. 2011). Conversely, induction of CLPs has been associated with the development of fibrotic  
373 lesions and cancer development with poor prognosis (reviewed in (Zhao, Su et al. 2020)). We used  
374 *Drosophila* as a tumor model to dissect CLP (*Idgf3*) function genetically in a secretory ductal organ,  
375 the salivary glands. We show that *Idgf3* promotes tumor overgrowth through the disruption of cell  
376 polarity. The induction of *Idgf3* disrupts cell organization and leads to the formation of enlarged  
377 endosome vesicles (EnVs) which accumulate in the cytoplasm. Genetically, *Idgf3* is induced via a pro-  
378 tumorigenic JNK and ROS signaling feedback loop. Consequently, *Idgf3* recruits the spectrin-based  
379 membrane skeleton (SBMS) for the formation of EnVs. Significantly, KD of *Idgf3* inhibits overgrowth,  
380 restores cell polarity, reduces ECM size and blocks EnVs formation.

381 Our identification of a contribution of JNK signaling and both extra- and intracellular ROS to dysplasia  
382 is in line with previous findings from other *Drosophila* tumor models (Fogarty and Bergmann 2017).  
383 Similarly, like others (Fogarty and Bergmann 2017) we observe an amplification loop between ROS  
384 and JNK signaling, which augments the dysplastic phenotype ((Krautz, Khalili et al. 2020) and this  
385 work). Several studies have demonstrated that activation of JNK signaling in mammals promotes the  
386 progression of ductal tumors (Yeh, Hou et al. 2006, Tang, Sun et al. 2013, Insua-Rodriguez, Pein et al.  
387 2018). Here we identify *Idgf3* as an additional component that feeds into JNK signaling. Ultimately in  
388 Ras<sup>V12</sup>-expressing SGs this leads to the formation of EnVs involving Spectrins. Under physiological  
389 conditions, members of the Spectrin family have a supporting role in maintaining cellular architecture  
390 through interaction with phospholipids and actively promoting polymerization of F-actin (Juliano,  
391 Kimelberg et al. 1971, Pinder, Bray et al. 1975, Hardy and Schrier 1978). Moreover, the secretory  
392 activity of ductal organs has been shown to be facilitated by Spectrins (Lattner, Leng et al. 2019).

393 During *Drosophila* development and under physiological conditions, the pathway that involves  
394 Spectrins, Rac1 and Pak1 has been shown to be required for the maintenance of cell polarity while  
395 when deregulated it leads to the formation of enlarged vesicles similar to the EnVs (Lee and Thomas  
396 2011). Thus, our results provide a possible link between the observed induction of CLPs in a range of  
397 tumors and the effects of Spectrins and their deregulation in tumors (Ackermann and Brieger 2019,  
398 Yang, Yang et al. 2021). In addition to the genetic interaction we find, previous work suggests an  
399 additional mechanical link via a Spectrin binding protein (Human spectrin Src homology domain  
400 binding protein1; Hssh3bp1, (Ziemnicka-Kotula, Xu et al. 1998)) the loss of which has been associated  
401 with prostatic tumors (Macoska, Xu et al. 2001). Hhh3bp1 may influence tumor progression possibly  
402 through interaction with tyrosine kinases such as Abelson kinase (Macoska, Xu et al. 2001).  
403 Interestingly Hhh3bp1 is a marker and possible regulator of macropinocytosis (Dubielecka, Cui et al.  
404 2010), a recycling pathway that is known to be hijacked by Ras-transformed tumor cells to acquire  
405 nutrients (Recouvreux and Commisso 2017) and also leads to the formation of large intracellular  
406 vesicles (Ritter, Bresgen et al. 2021). In favor of this hypothesis macropinocytosis is known to depend  
407 on Rac1/Pak1 signaling although the resulting vesicles are usually smaller (0.2-5 micrometers) than  
408 EnVs (Maxson, Sarantis et al. 2021). We find that - like macropinocytosis - EnV-formation depends  
409 on the activity of growth factors (Recouvreux and Commisso 2017), in this case *Idgf3*, much in line  
410 with its original description as an *in vitro* mediator of insulin signaling (Kawamura, Shibata et al.  
411 1999). *In vivo*, under normal conditions *Idgf3* is required for proper formation of chitin-containing

412 structures, wound healing and cellular integrity (Pesch, Riedel et al. 2016). Thus, under these  
413 circumstances *Idgf3* acts to preserve cellular integrity including the epithelial character of SG cells  
414 upstream of spectrins. Conversely, in a non-physiological setting such as upon overexpression of  
415 *Ras<sup>V12</sup>*, this mechanism is overwhelmed leading to the breakdown of homeostasis, loss of cell polarity  
416 and the gland lumen, loss of secretory activity and the formation of EnVs larger than macropinocytotic  
417 vesicles. Large vesicles accompany several scenarios of non-apoptotic programmed cell death, which  
418 occurs a.o. in apoptosis-resistant tumors (Shubin, Demidyuk et al. 2016, Yan, Dawood et al. 2020).  
419 Such modes of cell death include methuosis, a deregulated form of macropinocytosis (Shubin,  
420 Demidyuk et al. 2016, Ritter, Bresgen et al. 2021). Of note, apoptotic cell death is inhibited in  
421 *Drosophila* polytenic SGs to account for the increased number of DNA breaks that occur during  
422 endoreplication, which in mitotic cells induce apoptosis in both a p53-dependent and independent  
423 manner (Mehrotra, Maqbool et al. 2008, Zhang, Mehrotra et al. 2014). In line, despite the activation of  
424 caspase activity and nuclear fragmentation, which are considered hallmarks of apoptosis, *Ras<sup>V12</sup>* SG  
425 cells don't disintegrate to produce apoptotic bodies (Krautz, Khalili et al. 2020). This may also explain  
426 the difference to mitotically cycling tumor models, which also activate JNK – yet with apoptosis as an  
427 outcome (Uhlirva and Bohmann 2006, Araki, Kurihara et al. 2019, Parvy, Yu et al. 2019). Thus, SGs  
428 provide a suitable model for apoptosis-resistant tumors. In a mammalian setting, the phenotypes that  
429 are associated with non-apoptotic cell death such as disruption of cellular polarity and reorganization  
430 of the ECM provide potential targets for therapeutic treatments (Insua-Rodriguez, Pein et al. 2018).  
431 Our work adds CLPs and spectrins to this list. Depending on the tissue environment and similar to JNK  
432 signaling, CLP's may have varying roles in a context-dependent manner. Overexpression of *Idgf3*  
433 alone is not sufficient for the loss of cell polarity, overgrowth, and fibrosis. Collectively, this suggests  
434 a tumor-specific phenotype for *Idgf3* (Fig. 6B-J), in line with mammalian CLPs (reviewed in (Zhao,  
435 Su et al. 2020)). Due to their pleiotropic effects, further investigation of CLPs role will be required to  
436 dissect their molecular function in a given tissue and to ultimately design tumor-specific treatments  
437 (Kzhyshkowska, Larionova et al. 2019).

438 Taken together our findings provide new insight into the loss of tissue integrity in a neoplastic tumor  
439 model including the contribution of CLPs, Spectrins and alternative forms of cell death. This may  
440 provide further ways to test how developmentally and physiologically important conserved  
441 mechanisms that maintain cellular hemostasis - when deregulated - contribute to tumor progression.

## 442 **5 Conflict of Interest**

443 The authors declare that the research was conducted in the absence of any commercial or financial  
444 relationships that could be construed as a potential conflict of interest.

## 445 **6 Author Contributions**

446 D.K., U.T and M.K. conceived the research and designed the experiments; D.K., M.K., S.H. and A.M.  
447 performed experiments and data analysis, D.K., U.T. and M.K. wrote the paper and participated in  
448 the revisions. All authors read and approved the final manuscript.

## 449 **7 Funding**

450 Swedish Cancer Foundation (CAN 2015-546)

451 Wenner-Gren Foundation (UPD2020-0094 and UPD2021-0095 to MK)

452 Swedish Research Council (VR 2016-04077 and VR 2021-04841)



## 453 **8 Acknowledgments**

454 We would like to thank Chris Molenaar, Roger Karlsson, Stina Höglund and the Imaging facility at  
455 Stockholm University for support with all aspects of microscopy. We would also like to thank Vasilios  
456 Tsarouhas for his critical feedback. This work was supported by grants from the Swedish Cancer  
457 Foundation (CAN 2015-546), the Wenner-Gren Foundation (UPD2020-0094 and UPD2021-0095 to  
458 MK) and the Swedish Research Council (VR 2016-04077 and VR 2021-04841).

## 459 **9 Reference**

- 460 Ackermann, A. and A. Brieger (2019). "The Role of Nonerythroid Spectrin alphaII in Cancer." *J Oncol* **2019**:  
461 7079604.  
462
- 463 Araki, M., M. Kurihara, S. Kinoshita, R. Awane, T. Sato, Y. Ohkawa and Y. H. Inoue (2019). "Anti-tumour  
464 effects of antimicrobial peptides, components of the innate immune system, against haematopoietic tumours in  
465 *Drosophila mxc* mutants." *Dis Model Mech* **12**(6).  
466
- 467 Archibald, A., C. Mihai, I. G. Macara and L. McCaffrey (2015). "Oncogenic suppression of apoptosis  
468 uncovers a Rac1/JNK proliferation pathway activated by loss of Par3." *Oncogene* **34**(24): 3199-3206.  
469 Baek, S. H., Y. C. Kwon, H. Lee and K. M. Choe (2010). "Rho-family small GTPases are required for cell  
470 polarization and directional sensing in *Drosophila* wound healing." *Biochem Biophys Res Commun* **394**(3):  
471 488-492.  
472
- 473 Bartlett, B. J., P. Isakson, J. Lewerenz, H. Sanchez, R. W. Kotzebue, R. C. Cumming, G. L. Harris, I. P. Nezis,  
474 D. R. Schubert, A. Simonsen and K. D. Finley (2011). "p62, Ref(2)P and ubiquitinated proteins are conserved  
475 markers of neuronal aging, aggregate formation and progressive autophagic defects." *Autophagy* **7**(6): 572-  
476 583.  
477
- 478 Bennett, V. and A. J. Baines (2001). "Spectrin and ankyrin-based pathways: metazoan inventions for  
479 integrating cells into tissues." *Physiol Rev* **81**(3): 1353-1392.  
480 Brumby, A. M. and H. E. Richardson (2003). "scribble mutants cooperate with oncogenic Ras or Notch to  
481 cause neoplastic overgrowth in *Drosophila*." *EMBO J* **22**(21): 5769-5779.  
482
- 483 Ciapponi, L., D. B. Jackson, M. Mlodzik and D. Bohmann (2001). "*Drosophila* Fos mediates ERK and JNK  
484 signals via distinct phosphorylation sites." *Genes Dev* **15**(12): 1540-1553.  
485
- 486 Diwanji, N. and A. Bergmann (2017). "The beneficial role of extracellular reactive oxygen species in  
487 apoptosis-induced compensatory proliferation." *Fly (Austin)* **11**(1): 46-52.  
488
- 489 Dubielecka, P. M., P. Cui, X. Xiong, S. Hossain, S. Heck, L. Angelov and L. Kotula (2010). "Differential  
490 regulation of macropinocytosis by Abi1/Hssh3bp1 isoforms." *PLoS One* **5**(5): e10430.  
491
- 492 Fletcher, G. C., A. Elbediwy, I. Khanal, P. S. Ribeiro, N. Tapon and B. J. Thompson (2015). "The Spectrin  
493 cytoskeleton regulates the Hippo signalling pathway." *EMBO J* **34**(7): 940-954.  
494
- 495 Fogarty, C. E. and A. Bergmann (2017). "Killers creating new life: caspases drive apoptosis-induced  
496 proliferation in tissue repair and disease." *Cell Death Differ* **24**(8): 1390-1400.  
497
- 498 Hardy, B. and S. L. Schrier (1978). "The role of spectrin in erythrocyte ghost endocytosis." *Biochem Biophys*  
499 *Res Commun* **81**(4): 1153-1161.  
500
- 501 Igaki, T., R. A. Pagliarini and T. Xu (2006). "Loss of cell polarity drives tumor growth and invasion through  
502 JNK activation in *Drosophila*." *Curr Biol* **16**(11): 1139-1146.

503  
504 Inua-Rodriguez, J., M. Pein, T. Hongu, J. Meier, A. Descot, C. M. Lowy, E. De Braekeleer, H. P. Sinn, S.  
505 Spaich, M. Sutterlin, A. Schneeweiss and T. Oskarsson (2018). "Stress signaling in breast cancer cells induces  
506 matrix components that promote chemoresistant metastasis." EMBO Mol Med **10**(10).  
507  
508 Johansen, J. S., B. V. Jensen, A. Roslind, D. Nielsen and P. A. Price (2006). "Serum YKL-40, a new  
509 prognostic biomarker in cancer patients?" Cancer Epidemiol Biomarkers Prev **15**(2): 194-202.  
510  
511 Juliano, R. L., H. K. Kimelberg and D. Papahadjopoulos (1971). "Synergistic effects of a membrane protein  
512 (spectrin) and Ca<sup>2+</sup> on the Na<sup>+</sup> permeability of phospholipid vesicles." Biochim Biophys Acta **241**(3): 894-  
513 905.  
514  
515 Karlsson, C., A. M. Korayem, C. Scherfer, O. Loseva, M. S. Dushay and U. Theopold (2004). "Proteomic  
516 analysis of the Drosophila larval hemolymph clot." J Biol Chem **279**(50): 52033-52041.  
517  
518 Kawamura, K., T. Shibata, O. Saget, D. Peel and P. J. Bryant (1999). "A new family of growth factors  
519 produced by the fat body and active on Drosophila imaginal disc cells." Development **126**(2): 211-219.  
520  
521 Khalili, D., C. Kalcher, S. Baumgartner and U. Theopold (2021). "Anti-Fibrotic Activity of an Antimicrobial  
522 Peptide in a Drosophila Model." J Innate Immun **13**(6): 376-390.  
523  
524 Khalili, D., C. Kalcher, S. Baumgartner and U. Theopold (2021). "Anti-Fibrotic Activity of an Antimicrobial  
525 Peptide in a Drosophila Model." J Innate Immun: 1-15.  
526  
527 Kirkpatrick, R. B., R. E. Matico, D. E. McNulty, J. E. Strickler and M. Rosenberg (1995). "An abundantly  
528 secreted glycoprotein from Drosophila melanogaster is related to mammalian secretory proteins produced in  
529 rheumatoid tissues and by activated macrophages." Gene **153**(2): 147-154.  
530  
531 Krautz, R., D. Khalili and U. Theopold (2020). "Tissue-autonomous immune response regulates stress  
532 signalling during hypertrophy." Elife **9**.  
533  
534 Kucerova, L., V. Broz, B. Arefin, H. O. Maaroufi, J. Hurychova, H. Strnad, M. Zurovec and U. Theopold  
535 (2015). "The Drosophila Chitinase-Like Protein IDGF3 Is Involved in Protection against Nematodes and in  
536 Wound Healing." J Innate Immun.  
537  
538 Kucerova, L., O. I. Kubrak, J. M. Bengtsson, H. Strnad, S. Nylin, U. Theopold and D. R. Nassel (2016).  
539 "Slowed aging during reproductive dormancy is reflected in genome-wide transcriptome changes in  
540 Drosophila melanogaster." BMC Genomics **17**(1): 50.  
541  
542 Kzhyshkowska, J., I. Larionova and T. Liu (2019). "YKL-39 as a Potential New Target for Anti-Angiogenic  
543 Therapy in Cancer." Front Immunol **10**: 2930.  
544  
545 Lattner, J., W. Leng, E. Knust, M. Brankatschk and D. Flores-Benitez (2019). "Crumbs organizes the transport  
546 machinery by regulating apical levels of PI(4,5)P2 in Drosophila." Elife **8**.  
547  
548 Lee, C. G., C. A. Da Silva, C. S. Dela Cruz, F. Ahangari, B. Ma, M. J. Kang, C. H. He, S. Takyar and J. A.  
549 Elias (2011). "Role of chitin and chitinase/chitinase-like proteins in inflammation, tissue remodeling, and  
550 injury." Annual review of physiology **73**: 479-501.  
551  
552 Lee, S. K. and G. H. Thomas (2011). "Rac1 modulation of the apical domain is negatively regulated by beta  
553 (Heavy)-spectrin." Mech Dev **128**(1-2): 116-128.  
554

- 555 Macoska, J. A., J. Xu, D. Ziemnicka, T. S. Schwab, M. A. Rubin and L. Kotula (2001). "Loss of expression of  
556 human spectrin src homology domain binding protein 1 is associated with 10p loss in human prostatic  
557 adenocarcinoma." Neoplasia **3**(2): 99-104.  
558
- 559 Maxson, M. E., H. Sarantis, A. Volchuk, J. H. Brumell and S. Grinstein (2021). "Rab5 regulates  
560 macropinocytosis by recruiting the inositol 5-phosphatases OCRL and Inpp5b that hydrolyse PtdIns(4,5)P2." J  
561 Cell Sci **134**(7).  
562
- 563 Mehrotra, S., S. B. Maqbool, A. Kolpakas, K. Murnen and B. R. Calvi (2008). "Endocycling cells do not  
564 apoptose in response to DNA rereplication genotoxic stress." Genes Dev **22**(22): 3158-3171.  
565
- 566 Morera, E., S. S. Steinhauer, Z. Budkova, S. Ingthorsson, J. Krickler, A. Krueger, G. A. Traustadottir and T.  
567 Gudjonsson (2019). "YKL-40/CHI3L1 facilitates migration and invasion in HER2 overexpressing breast  
568 epithelial progenitor cells and generates a niche for capillary-like network formation." In Vitro Cell Dev Biol  
569 Anim **55**(10): 838-853.  
570
- 571 Pagliarini, R. A. and T. Xu (2003). "A genetic screen in *Drosophila* for metastatic behavior." Science  
572 **302**(5648): 1227-1231.  
573
- 574 Palmerini, V., S. Monzani, Q. Laurichesse, R. Loudhaief, S. Mari, V. Cecatiello, V. Olieric, S. Pasqualato, J.  
575 Colombani, D. S. Andersen and M. Mapelli (2021). "*Drosophila* TNFRs Grindelwald and Wengen bind Eiger  
576 with different affinities and promote distinct cellular functions." Nat Commun **12**(1): 2070.  
577
- 578 Park, K. R., H. M. Yun, K. Yoo, Y. W. Ham, S. B. Han and J. T. Hong (2020). "Chitinase 3 like 1 suppresses  
579 the stability and activity of p53 to promote lung tumorigenesis." Cell Commun Signal **18**(1): 5.  
580
- 581 Parvy, J. P., Y. Yu, A. Dostalova, S. Kondo, A. Kurjan, P. Bulet, B. Lemaitre, M. Vidal and J. B. Cordero  
582 (2019). "The antimicrobial peptide defensin cooperates with tumour necrosis factor to drive tumour cell death  
583 in *Drosophila*." Elife **8**.  
584
- 585 Perez, E., J. L. Lindblad and A. Bergmann (2017). "Tumor-promoting function of apoptotic caspases by an  
586 amplification loop involving ROS, macrophages and JNK in *Drosophila*." Elife **6**.  
587
- 588 Pesch, Y. Y., D. Riedel, K. R. Patil, G. Loch and M. Behr (2016). "Chitinases and Imaginal disc growth  
589 factors organize the extracellular matrix formation at barrier tissues in insects." Sci Rep **6**: 18340.  
590
- 591 Pinder, J. C., D. Bray and W. B. Gratzer (1975). "Actin polymerisation induced by spectrin." Nature  
592 **258**(5537): 765-766.  
593
- 594 Recouvreur, M. V. and C. Commisso (2017). "Macropinocytosis: A Metabolic Adaptation to Nutrient Stress  
595 in Cancer." Front Endocrinol (Lausanne) **8**: 261.  
596
- 597 Ritter, M., N. Bresgen and H. H. Kerschbaum (2021). "From Pinocytosis to Methuosis-Fluid Consumption as  
598 a Risk Factor for Cell Death." Front Cell Dev Biol **9**: 651982.  
599
- 600 Roslind, A. and J. S. Johansen (2009). "YKL-40: a novel marker shared by chronic inflammation and  
601 oncogenic transformation." Methods Mol Biol **511**: 159-184.  
602
- 603 Shao, R., K. Hamel, L. Petersen, Q. J. Cao, R. B. Arenas, C. Bigelow, B. Bentley and W. Yan (2009). "YKL-  
604 40, a secreted glycoprotein, promotes tumor angiogenesis." Oncogene **28**(50): 4456-4468.  
605
- 606 Shubin, A. V., I. V. Demidyuk, A. A. Komissarov, L. M. Rafieva and S. V. Kostrov (2016). "Cytoplasmic  
607 vacuolization in cell death and survival." Oncotarget **7**(34): 55863-55889.

- 608  
609 Tang, H., Y. Sun, Z. Shi, H. Huang, Z. Fang, J. Chen, Q. Xiu and B. Li (2013). "YKL-40 induces IL-8  
610 expression from bronchial epithelium via MAPK (JNK and ERK) and NF-kappaB pathways, causing  
611 bronchial smooth muscle proliferation and migration." *J Immunol* **190**(1): 438-446.  
612
- 613 Uhlen, M., C. Zhang, S. Lee, E. Sjostedt, L. Fagerberg, G. Bidkhor, R. Benfeitas, M. Arif, Z. Liu, F. Edfors,  
614 K. Sanli, K. von Feilitzen, P. Oksvold, E. Lundberg, S. Hober, P. Nilsson, J. Mattsson, J. M. Schwenk, H.  
615 Brunnstrom, B. Glimelius, T. Sjoblom, P. H. Edqvist, D. Djureinovic, P. Micke, C. Lindskog, A. Mardinoglu  
616 and F. Ponten (2017). "A pathology atlas of the human cancer transcriptome." *Science* **357**(6352).  
617
- 618 Uhlirova, M. and D. Bohmann (2006). "JNK- and Fos-regulated Mmp1 expression cooperates with Ras to  
619 induce invasive tumors in Drosophila." *Embo J* **25**(22): 5294-5304.  
620
- 621 Wertheimer, E., A. Gutierrez-Uzquiza, C. Rosembli, C. Lopez-Haber, M. S. Sosa and M. G. Kazanietz  
622 (2012). "Rac signaling in breast cancer: a tale of GEFs and GAPs." *Cell Signal* **24**(2): 353-362.  
623
- 624 Williams, S. T., A. N. Smith, C. D. Cianci, J. S. Morrow and T. L. Brown (2003). "Identification of the  
625 primary caspase 3 cleavage site in alpha II-spectrin during apoptosis." *Apoptosis* **8**(4): 353-361.  
626
- 627 Yadav, S. and I. Eleftherianos (2018). "The Imaginal Disc Growth Factors 2 and 3 participate in the  
628 Drosophila response to nematode infection." *Parasite Immunol* **40**(10): e12581.  
629
- 630 Yan, G., M. Dawood, M. Bockers, S. M. Klauck, C. Fottner, M. M. Weber and T. Efferth (2020). "Multiple  
631 modes of cell death in neuroendocrine tumors induced by artesunate." *Phytomedicine* **79**: 153332.  
632
- 633 Yang, P., Y. Yang, P. Sun, Y. Tian, F. Gao, C. Wang, T. Zong, M. Li, Y. Zhang, T. Yu and Z. Jiang (2021).  
634 "betaII spectrin (SPTBN1): biological function and clinical potential in cancer and other diseases." *Int J Biol*  
635 *Sci* **17**(1): 32-49.  
636
- 637 Yeh, Y. T., M. F. Hou, Y. F. Chung, Y. J. Chen, S. F. Yang, D. C. Chen, J. H. Su and S. S. Yuan (2006).  
638 "Decreased expression of phosphorylated JNK in breast infiltrating ductal carcinoma is associated with a  
639 better overall survival." *Int J Cancer* **118**(11): 2678-2684.  
640
- 641 Zeke, A., M. Misheva, A. Remenyi and M. A. Bogoyevitch (2016). "JNK Signaling: Regulation and Functions  
642 Based on Complex Protein-Protein Partnerships." *Microbiol Mol Biol Rev* **80**(3): 793-835.  
643
- 644 Zhang, B., S. Mehrotra, W. L. Ng and B. R. Calvi (2014). "Low levels of p53 protein and chromatin silencing  
645 of p53 target genes repress apoptosis in Drosophila endocycling cells." *PLoS Genet* **10**(9): e1004581.  
646
- 647 Zhao, T., Z. Su, Y. Li, X. Zhang and Q. You (2020). "Chitinase-3 like-protein-1 function and its role in  
648 diseases." *Signal Transduct Target Ther* **5**(1): 201.  
649
- 650 Zhu, M., T. Xin, S. Weng, Y. Gao, Y. Zhang, Q. Li and M. Li (2010). "Activation of JNK signaling links Igl  
651 mutations to disruption of the cell polarity and epithelial organization in Drosophila imaginal discs." *Cell Res*  
652 **20**(2): 242-245.  
653
- 654 Ziemnicka-Kotula, D., J. Xu, H. Gu, A. Potempska, K. S. Kim, E. C. Jenkins, E. Trenkner and L. Kotula  
655 (1998). "Identification of a candidate human spectrin Src homology 3 domain-binding protein suggests a  
656 general mechanism of association of tyrosine kinases with the spectrin-based membrane skeleton." *J Biol*  
657 *Chem* **273**(22): 13681-13692.

658
